# Supplementary material for: Identification of the Key microRNAs and miRNA-mRNA Interaction Networks during the Ovarian Development of Hens
Source: PubMed Central journal article supplement (PMC7552605; doi:10.3390/ani10091680), 2020-09-17
Supplement: animals-10-01680-s001.pdf [file animals-10-01680-s001.pdf]

Article

# Identification of the Key microRNAs and miRNA-mRNA Interaction Networks During the Ovarian Development of Hens

Jing Li <sup>†</sup>, Chong Li <sup>†</sup>, Qi Li, Wen-Ting Li, Hong Li, Guo-Xi Li, Xiang-Tao Kang, Xiao-Jun Liu and Ya-Dong Tian <sup>\*</sup>

College of Animal Science and Technology, Henan Agricultural University, Zhengzhou 450046, China; lijingbj\_87@126.com (J.L.); lc092411@163.com (C.L.); m18838939701@163.com (Q.L.); liwenting\_5959@hotmail.com (W.-T.L.); lihong19871202@163.com (H.L.); liguoxi0914@126.com (G.-X.L.); xtkang2001@263.net (X.-T.K.); xjliu2008@hotmail.com (X.-J.L.)

<sup>\*</sup> Correspondence: tianyadong@henau.edu.cn

<sup>†</sup> These two authors contributed equally to this work.

Received: 27 July 2020; Accepted: 15 September 2020; Published: date

**Supplementary Material**

**Table 1.** The list of the interaction network, the expression levels and Pearson's correlation coefficient of DE miRNAs and DE mRNAs.

| sRNA            | Expression Level ( TPM) |           |           |           | Transcript Id      | Gene Id            | Gene Name | Expression Level ( FPKM) |         |         |         | Correlation |
|-----------------|-------------------------|-----------|-----------|-----------|--------------------|--------------------|-----------|--------------------------|---------|---------|---------|-------------|
|                 | 15W                     | 20W       | 30W       | 68W       |                    |                    |           | 15W                      | 20W     | 30W     | 68W     |             |
| gga-miR-1560-3p | 3.253                   | 6.030     | 4.295     | 2.565     | ENSGALT00000087050 | ENSGALG00000005902 | RAB7A     | 17.832                   | 0.031   | 6.674   | 0.077   | -0.324      |
| gga-miR-143-3p  | 25118.987               | 49390.256 | 87681.664 | 32277.275 | ENSGALT00000069072 | ENSGALG00000041760 | CLTCL1    | 2.189                    | 0.000   | 1.321   | 1.252   | -0.268      |
| gga-miR-7472-5p | 0.054                   | 0.264     | 0.466     | 0.000     | ENSGALT00000066785 | ENSGALG00000014582 | CADM1     | 6.810                    | 2.342   | 0.000   | 0.000   | -0.394      |
| gga-miR-7472-5p | 0.054                   | 0.264     | 0.466     | 0.000     | ENSGALT00000033172 | ENSGALG00000008121 | CYP17A1   | 722.987                  | 675.854 | 233.756 | 239.151 | -0.236      |
| gga-miR-133a-3p | 107.574                 | 99.409    | 202.785   | 80.977    | ENSGALT00000093261 | ENSGALG00000001171 | SEMA6B    | 2.182                    | 0.013   | 0.000   | 0.000   | -0.187      |
| gga-miR-133a-3p | 107.574                 | 99.409    | 202.785   | 80.977    | ENSGALT00000091328 | ENSGALG00000008885 | PDE1A     | 1.907                    | 0.005   | 0.006   | 0.006   | -0.185      |
| gga-miR-133a-3p | 107.574                 | 99.409    | 202.785   | 80.977    | ENSGALT00000099646 | ENSGALG00000007116 | CABP1     | 0.457                    | 0.197   | 0.000   | 0.258   | -0.722      |
| gga-miR-133a-3p | 107.574                 | 99.409    | 202.785   | 80.977    | ENSGALT00000048408 | ENSGALG00000006895 | CEP131    | 1.062                    | 0.001   | 0.000   | 1.493   | -0.632      |
| gga-miR-133a-3p | 107.574                 | 99.409    | 202.785   | 80.977    | ENSGALT00000107742 | ENSGALG00000000374 | RNPEP     | 3.370                    | 0.000   | 0.000   | 0.000   | -0.185      |
| gga-miR-210b-5p | 11.042                  | 11.594    | 22.074    | 7.613     | ENSGALT00000070461 | ENSGALG00000004171 | RNF111    | 0.509                    | 0.298   | 0.000   | 0.301   | -0.796      |
| gga-miR-210b-5p | 11.042                  | 11.594    | 22.074    | 7.613     | ENSGALT00000087758 | ENSGALG00000000652 | ACOT7     | 0.639                    | 1.106   | 0.000   | 2.724   | -0.818      |
| gga-miR-133c-3p | 16.707                  | 15.505    | 33.699    | 9.452     | ENSGALT00000048408 | ENSGALG00000006895 | CEP131    | 1.062                    | 0.001   | 0.000   | 1.493   | -0.689      |
| gga-miR-133c-3p | 16.707                  | 15.505    | 33.699    | 9.452     | ENSGALT00000107742 | ENSGALG00000000374 | RNPEP     | 3.370                    | 0.000   | 0.000   | 0.000   | -0.137      |
| gga-miR-133c-3p | 16.707                  | 15.505    | 33.699    | 9.452     | ENSGALT00000099646 | ENSGALG00000007116 | CABP1     | 0.457                    | 0.197   | 0.000   | 0.258   | -0.690      |
| gga-miR-133c-3p | 16.707                  | 15.505    | 33.699    | 9.452     | ENSGALT00000012517 | ENSGALG00000007720 | AIFM3     | 0.453                    | 0.226   | 0.000   | 0.319   | -0.793      |
| gga-miR-133c-3p | 16.707                  | 15.505    | 33.699    | 9.452     | ENSGALT00000093261 | ENSGALG00000001171 | SEMA6B    | 2.182                    | 0.013   | 0.000   | 0.000   | -0.138      |
| gga-miR-143-5p  | 326.004                 | 491.847   | 823.909   | 272.415   | ENSGALT00000048408 | ENSGALG00000006895 | CEP131    | 1.062                    | 0.001   | 0.000   | 1.493   | -0.831      |
| gga-miR-143-5p  | 326.004                 | 491.847   | 823.909   | 272.415   | ENSGALT00000009304 | ENSGALG00000030677 | ABCG2     | 12.705                   | 13.497  | 0.000   | 0.000   | -0.312      |
| gga-miR-143-5p  | 326.004                 | 491.847   | 823.909   | 272.415   | ENSGALT00000074641 | ENSGALG00000006851 | -         | 2.618                    | 1.886   | 0.019   | 1.297   | -0.775      |
| gga-miR-143-5p  | 326.004                 | 491.847   | 823.909   | 272.415   | ENSGALT00000027488 | ENSGALG00000017018 | INTS6     | 2.543                    | 0.274   | 0.000   | 1.508   | -0.794      |
| gga-miR-143-5p  | 326.004                 | 491.847   | 823.909   | 272.415   | ENSGALT00000100689 | ENSGALG00000010733 | CEP170    | 0.275                    | 0.000   | 0.000   | 2.014   | -0.632      |
| gga-miR-143-5p  | 326.004                 | 491.847   | 823.909   | 272.415   | ENSGALT00000096177 | ENSGALG00000041423 | MAP7D3    | 5.262                    | 2.400   | 0.551   | 4.255   | -0.940      |
| gga-miR-143-5p  | 326.004                 | 491.847   | 823.909   | 272.415   | ENSGALT00000016815 | ENSGALG00000010331 | MME       | 42.012                   | 32.170  | 13.326  | 10.675  | -0.319      |
| gga-miR-143-5p  | 326.004                 | 491.847   | 823.909   | 272.415   | ENSGALT00000095588 | ENSGALG00000006704 | VPS8      | 1.563                    | 1.554   | 0.000   | 1.014   | -0.779      |

|                  |         |         |          |         |                    |                     |          |         |         |        |        |        |
|------------------|---------|---------|----------|---------|--------------------|---------------------|----------|---------|---------|--------|--------|--------|
| gga-miR-147      | 8.794   | 11.399  | 21.487   | 8.411   | ENSGALT00000078929 | ENSGALG00000000336  | PPP1R12B | 8.372   | 3.379   | 1.573  | 2.312  | -0.540 |
| gga-miR-147      | 8.794   | 11.399  | 21.487   | 8.411   | ENSGALT00000104695 | ENSGALG000000047393 | -        | 1.376   | 0.900   | 0.000  | 0.477  | -0.751 |
| gga-miR-2188-5p  | 36.772  | 53.518  | 59.863   | 48.895  | ENSGALT00000064808 | ENSGALG00000039742  | CYP21    | 22.317  | 18.391  | 2.432  | 10.416 | -0.795 |
| gga-miR-2188-5p  | 36.772  | 53.518  | 59.863   | 48.895  | ENSGALT00000081827 | ENSGALG00000020742  | PPRC1    | 0.762   | 0.165   | 0.000  | 0.186  | -0.968 |
| gga-miR-365-2-5p | 1.403   | 2.721   | 3.552    | 1.889   | ENSGALT00000095588 | ENSGALG00000006704  | VPS8     | 1.563   | 1.554   | 0.000  | 1.014  | -0.739 |
| gga-miR-365-2-5p | 1.403   | 2.721   | 3.552    | 1.889   | ENSGALT00000093261 | ENSGALG00000001171  | SEMA6B   | 2.182   | 0.013   | 0.000  | 0.000  | -0.696 |
| gga-miR-365-2-5p | 1.403   | 2.721   | 3.552    | 1.889   | ENSGALT00000081827 | ENSGALG00000020742  | PPRC1    | 0.762   | 0.165   | 0.000  | 0.186  | -0.838 |
| gga-miR-365-2-5p | 1.403   | 2.721   | 3.552    | 1.889   | ENSGALT00000005128 | ENSGALG00000003242  | STAR     | 298.770 | 154.884 | 31.693 | 48.914 | -0.665 |
| gga-miR-365-2-5p | 1.403   | 2.721   | 3.552    | 1.889   | ENSGALT00000071400 | ENSGALG00000010049  | PTPRB    | 2.151   | 0.001   | 0.000  | 0.068  | -0.715 |
| gga-miR-365-2-5p | 1.403   | 2.721   | 3.552    | 1.889   | ENSGALT00000012517 | ENSGALG00000007720  | AIFM3    | 0.453   | 0.226   | 0.000  | 0.319  | -0.986 |
| gga-miR-365-2-5p | 1.403   | 2.721   | 3.552    | 1.889   | ENSGALT00000093800 | ENSGALG00000010664  | KIF26B   | 0.516   | 0.007   | 0.006  | 0.003  | -0.693 |
| gga-miR-193a-5p  | 11.947  | 13.010  | 17.887   | 13.712  | ENSGALT00000106245 | ENSGALG00000015226  | SPIDR    | 1.548   | 1.039   | 0.000  | 0.534  | -0.924 |
| gga-miR-193a-5p  | 11.947  | 13.010  | 17.887   | 13.712  | ENSGALT00000002237 | ENSGALG00000001475  | STMN1    | 29.135  | 11.631  | 0.000  | 10.851 | -0.868 |
| gga-miR-193b-3p  | 5.495   | 5.774   | 9.309    | 4.190   | ENSGALT00000099612 | ENSGALG00000054034  | TNKS1BP1 | 1.927   | 0.000   | 0.000  | 0.000  | -0.212 |
| gga-miR-193b-3p  | 5.495   | 5.774   | 9.309    | 4.190   | ENSGALT00000017675 | ENSGALG00000010874  | UNC79    | 5.329   | 3.249   | 0.939  | 2.272  | -0.551 |
| gga-miR-193b-3p  | 5.495   | 5.774   | 9.309    | 4.190   | ENSGALT00000064808 | ENSGALG00000039742  | CYP21    | 22.317  | 18.391  | 2.432  | 10.416 | -0.630 |
| gga-miR-24-3p    | 913.412 | 963.960 | 1678.040 | 833.186 | ENSGALT00000001662 | ENSGALG00000001108  | MIER2    | 3.156   | 0.000   | 0.000  | 0.000  | -0.313 |
| gga-miR-24-3p    | 913.412 | 963.960 | 1678.040 | 833.186 | ENSGALT00000098722 | ENSGALG00000009915  | EML4     | 1.337   | 0.777   | 0.000  | 0.530  | -0.751 |
| gga-miR-24-3p    | 913.412 | 963.960 | 1678.040 | 833.186 | ENSGALT00000059290 | ENSGALG00000010879  | FGGY     | 0.529   | 0.256   | 0.009  | 0.672  | -0.879 |
| gga-miR-24-3p    | 913.412 | 963.960 | 1678.040 | 833.186 | ENSGALT00000044013 | ENSGALG00000004671  | ANKRD27  | 2.304   | 1.178   | 0.000  | 0.923  | -0.741 |
| gga-miR-24-3p    | 913.412 | 963.960 | 1678.040 | 833.186 | ENSGALT00000100689 | ENSGALG00000010733  | CEP170   | 0.275   | 0.000   | 0.000  | 2.014  | -0.512 |
| gga-miR-365-1-5p | 0.581   | 0.457   | 1.890    | 1.661   | ENSGALT00000093800 | ENSGALG00000010664  | KIF26B   | 0.516   | 0.007   | 0.006  | 0.003  | -0.518 |
| gga-miR-365-1-5p | 0.581   | 0.457   | 1.890    | 1.661   | ENSGALT00000095588 | ENSGALG00000006704  | VPS8     | 1.563   | 1.554   | 0.000  | 1.014  | -0.889 |
| gga-miR-365-1-5p | 0.581   | 0.457   | 1.890    | 1.661   | ENSGALT00000005128 | ENSGALG00000003242  | STAR     | 298.770 | 154.884 | 31.693 | 48.914 | -0.841 |
| gga-miR-365-1-5p | 0.581   | 0.457   | 1.890    | 1.661   | ENSGALT00000071400 | ENSGALG00000010049  | PTPRB    | 2.151   | 0.001   | 0.000  | 0.068  | -0.506 |
| gga-miR-365-1-5p | 0.581   | 0.457   | 1.890    | 1.661   | ENSGALT00000093261 | ENSGALG00000001171  | SEMA6B   | 2.182   | 0.013   | 0.000  | 0.000  | -0.520 |
| gga-miR-34a-5p   | 16.395  | 10.628  | 29.991   | 23.554  | ENSGALT00000091480 | ENSGALG00000015787  | RNGTT    | 11.812  | 6.155   | 1.273  | 8.937  | -0.527 |
| gga-miR-34a-5p   | 16.395  | 10.628  | 29.991   | 23.554  | ENSGALT00000011022 | ENSGALG00000006818  | -        | 0.400   | 0.001   | 0.001  | 0.001  | -0.296 |

|                  |          |          |           |          |                    |                    |        |         |         |        |         |        |
|------------------|----------|----------|-----------|----------|--------------------|--------------------|--------|---------|---------|--------|---------|--------|
| gga-miR-34a-5p   | 16.395   | 10.628   | 29.991    | 23.554   | ENSGALT00000101371 | ENSGALG00000012934 | BICD1  | 3.700   | 1.141   | 0.002  | 0.863   | -0.541 |
| gga-miR-146a-3p  | 13.579   | 15.887   | 20.732    | 28.434   | ENSGALT00000070917 | ENSGALG00000029917 | SGCA   | 0.138   | 0.169   | 0.000  | 0.053   | -0.662 |
| gga-miR-146a-3p  | 13.579   | 15.887   | 20.732    | 28.434   | ENSGALT00000101295 | ENSGALG00000005646 | TSC2   | 0.486   | 0.919   | 0.000  | 0.000   | -0.737 |
| gga-miR-146a-3p  | 13.579   | 15.887   | 20.732    | 28.434   | ENSGALT00000101350 | ENSGALG00000037370 | NAV1   | 0.241   | 0.000   | 0.000  | 0.016   | -0.570 |
| gga-miR-146a-3p  | 13.579   | 15.887   | 20.732    | 28.434   | ENSGALT00000075830 | ENSGALG00000008368 | RAD18  | 0.672   | 0.184   | 0.000  | 0.553   | -0.012 |
| gga-miR-146a-3p  | 13.579   | 15.887   | 20.732    | 28.434   | ENSGALT00000093261 | ENSGALG00000001171 | SEMA6B | 2.182   | 0.013   | 0.000  | 0.000   | -0.621 |
| gga-miR-146a-3p  | 13.579   | 15.887   | 20.732    | 28.434   | ENSGALT00000095588 | ENSGALG00000006704 | VPS8   | 1.563   | 1.554   | 0.000  | 1.014   | -0.446 |
| gga-miR-146a-3p  | 13.579   | 15.887   | 20.732    | 28.434   | ENSGALT00000093800 | ENSGALG00000010664 | KIF26B | 0.516   | 0.007   | 0.006  | 0.003   | -0.622 |
| gga-miR-146a-3p  | 13.579   | 15.887   | 20.732    | 28.434   | ENSGALT00000001662 | ENSGALG00000001108 | MIER2  | 3.156   | 0.000   | 0.000  | 0.000   | -0.617 |
| gga-miR-146a-3p  | 13.579   | 15.887   | 20.732    | 28.434   | ENSGALT00000099646 | ENSGALG00000007116 | CABP1  | 0.457   | 0.197   | 0.000  | 0.258   | -0.339 |
| gga-miR-146a-3p  | 13.579   | 15.887   | 20.732    | 28.434   | ENSGALT00000073855 | ENSGALG00000014795 | TGIF1  | 7.612   | 5.591   | 0.119  | 2.800   | -0.662 |
| gga-miR-146a-3p  | 13.579   | 15.887   | 20.732    | 28.434   | ENSGALT00000102768 | ENSGALG00000002643 | -      | 1.676   | 0.057   | 0.000  | 1.762   | -0.263 |
| gga-miR-302b-3p  | 22.298   | 0.305    | 2.840     | 3.852    | ENSGALT00000084083 | ENSGALG00000043379 | RPL14  | 165.021 | 175.280 | 31.810 | 147.775 | -0.291 |
| gga-miR-146b-5p  | 8117.249 | 8015.714 | 17158.741 | 8507.245 | ENSGALT00000026780 | ENSGALG00000016592 | PRPS2  | 0.778   | 1.435   | 0.082  | 1.225   | -0.888 |
| gga-miR-34a-5p   | 16.395   | 10.628   | 29.991    | 23.554   | ENSGALT00000093630 | ENSGALG00000043576 | AGAP3  | 0.000   | 0.406   | 0.000  | 0.000   | -0.752 |
| gga-miR-34a-5p   | 16.395   | 10.628   | 29.991    | 23.554   | ENSGALT00000035097 | ENSGALG00000021647 | NRTN   | 0.204   | 1.902   | 0.044  | 3.635   | -0.141 |
| gga-miR-34a-5p   | 16.395   | 10.628   | 29.991    | 23.554   | ENSGALT00000069310 | ENSGALG00000035602 | ZNF536 | 0.008   | 0.675   | 0.005  | 0.006   | -0.755 |
| gga-miR-34a-5p   | 16.395   | 10.628   | 29.991    | 23.554   | ENSGALT00000103998 | ENSGALG00000034475 | EIF3G  | 0.000   | 7.082   | 0.000  | 11.292  | -0.205 |
| gga-miR-34a-5p   | 16.395   | 10.628   | 29.991    | 23.554   | ENSGALT00000054394 | ENSGALG00000011662 | NUP205 | 4.060   | 7.402   | 0.453  | 1.066   | -0.962 |
| gga-miR-34a-5p   | 16.395   | 10.628   | 29.991    | 23.554   | ENSGALT00000095537 | ENSGALG00000028561 | SZT2   | 0.000   | 0.646   | 0.000  | 0.497   | -0.524 |
| gga-miR-365-1-5p | 0.581    | 0.457    | 1.890     | 1.661    | ENSGALT00000083042 | ENSGALG00000040369 | PFKFB3 | 0.009   | 1.339   | 0.014  | 0.579   | -0.449 |
| gga-miR-146a-3p  | 13.579   | 15.887   | 20.732    | 28.434   | ENSGALT00000107299 | ENSGALG00000037869 | -      | 0.396   | 0.000   | 0.308  | 0.000   | -0.511 |
| gga-miR-365-1-5p | 0.581    | 0.457    | 1.890     | 1.661    | ENSGALT00000037720 | ENSGALG00000011171 | TBP    | 4.296   | 1.744   | 4.104  | 0.014   | -0.129 |
| gga-miR-6606-5p  | 1.384    | 2.794    | 0.925     | 2.184    | ENSGALT00000001353 | ENSGALG00000000919 | PIGR   | 3.927   | 2.400   | 2.500  | 0.181   | -0.405 |
| gga-miR-6606-5p  | 1.384    | 2.794    | 0.925     | 2.184    | ENSGALT00000097297 | ENSGALG00000033170 | GMDS   | 1.229   | 0.310   | 0.014  | 0.036   | -0.166 |
| gga-miR-6606-5p  | 1.384    | 2.794    | 0.925     | 2.184    | ENSGALT00000096958 | ENSGALG00000003741 | MYO18A | 0.561   | 0.498   | 0.582  | 0.000   | -0.412 |
| gga-miR-34a-5p   | 16.395   | 10.628   | 29.991    | 23.554   | ENSGALT00000073682 | ENSGALG00000002347 | DIPK2A | 0.312   | 0.000   | 0.111  | 0.000   | -0.020 |
| gga-miR-365-1-5p | 0.581    | 0.457    | 1.890     | 1.661    | ENSGALT00000061072 | ENSGALG00000016391 | CNKSR2 | 0.063   | 0.361   | 0.076  | 0.000   | -0.646 |

|                  |         |        |        |        |                    |                    |         |         |         |         |         |        |
|------------------|---------|--------|--------|--------|--------------------|--------------------|---------|---------|---------|---------|---------|--------|
| gga-miR-365-1-5p | 0.581   | 0.457  | 1.890  | 1.661  | ENSGALT00000055413 | ENSGALG00000011570 | ILF2    | 0.107   | 1.735   | 0.556   | 0.000   | -0.484 |
| gga-miR-146a-3p  | 13.579  | 15.887 | 20.732 | 28.434 | ENSGALT00000094599 | ENSGALG00000054458 | AKT2    | 0.050   | 0.425   | 0.372   | 0.000   | -0.351 |
| gga-miR-146a-3p  | 13.579  | 15.887 | 20.732 | 28.434 | ENSGALT00000058144 | ENSGALG00000032184 | CSPG5   | 0.031   | 0.319   | 0.163   | 0.000   | -0.424 |
| gga-miR-146a-3p  | 13.579  | 15.887 | 20.732 | 28.434 | ENSGALT00000097817 | ENSGALG00000051144 | EVI5L   | 0.419   | 2.392   | 1.284   | 0.000   | -0.489 |
| gga-miR-146a-3p  | 13.579  | 15.887 | 20.732 | 28.434 | ENSGALT00000093630 | ENSGALG00000043576 | AGAP3   | 0.000   | 0.406   | 0.000   | 0.000   | -0.383 |
| gga-miR-204      | 173.788 | 85.174 | 21.500 | 43.574 | ENSGALT00000007773 | ENSGALG00000004869 | ISCU    | 21.898  | 30.649  | 31.628  | 10.988  | -0.069 |
| gga-miR-449c-5p  | 10.423  | 3.526  | 1.891  | 1.095  | ENSGALT00000103998 | ENSGALG00000034475 | EIF3G   | 0.000   | 7.082   | 0.000   | 11.292  | -0.569 |
| gga-miR-449c-5p  | 10.423  | 3.526  | 1.891  | 1.095  | ENSGALT00000094484 | ENSGALG00000014155 | OGDH    | 0.000   | 0.159   | 0.132   | 0.166   | -0.954 |
| gga-miR-449c-5p  | 10.423  | 3.526  | 1.891  | 1.095  | ENSGALT00000081517 | ENSGALG00000001331 | ST14    | 0.003   | 1.783   | 0.779   | 1.383   | -0.750 |
| gga-miR-449c-5p  | 10.423  | 3.526  | 1.891  | 1.095  | ENSGALT00000105774 | ENSGALG00000013462 | STX17   | 0.032   | 1.541   | 0.506   | 0.515   | -0.456 |
| gga-miR-449c-5p  | 10.423  | 3.526  | 1.891  | 1.095  | ENSGALT00000093630 | ENSGALG00000043576 | AGAP3   | 0.000   | 0.406   | 0.000   | 0.000   | -0.111 |
| gga-miR-449c-5p  | 10.423  | 3.526  | 1.891  | 1.095  | ENSGALT00000107116 | ENSGALG00000003601 | ATP2B4  | 0.000   | 0.662   | 1.826   | 1.436   | -0.893 |
| gga-miR-449c-5p  | 10.423  | 3.526  | 1.891  | 1.095  | ENSGALT00000011727 | ENSGALG00000007247 | PXN     | 0.001   | 1.756   | 3.481   | 0.823   | -0.629 |
| gga-miR-449c-5p  | 10.423  | 3.526  | 1.891  | 1.095  | ENSGALT00000054103 | ENSGALG00000001157 | DENND1A | 0.006   | 2.860   | 0.016   | 0.015   | -0.114 |
| gga-miR-449c-5p  | 10.423  | 3.526  | 1.891  | 1.095  | ENSGALT00000079430 | ENSGALG00000033061 | CAMK2B  | 0.000   | 0.366   | 0.278   | 0.124   | -0.628 |
| gga-miR-1720-5p  | 10.651  | 5.238  | 1.120  | 1.726  | ENSGALT00000081517 | ENSGALG00000001331 | ST14    | 0.003   | 1.783   | 0.779   | 1.383   | -0.576 |
| gga-miR-1720-5p  | 10.651  | 5.238  | 1.120  | 1.726  | ENSGALT00000095819 | ENSGALG00000040241 | NTRK3   | 0.000   | 0.780   | 1.302   | 0.000   | -0.503 |
| gga-miR-449b-5p  | 7.996   | 4.869  | 1.359  | 0.942  | ENSGALT00000016938 | ENSGALG00000010402 | HPGDS   | 18.967  | 30.772  | 73.991  | 39.090  | -0.759 |
| gga-miR-449b-5p  | 7.996   | 4.869  | 1.359  | 0.942  | ENSGALT00000036373 | ENSGALG00000047152 | HBBA    | 70.218  | 115.320 | 220.605 | 246.446 | -0.982 |
| gga-miR-449b-5p  | 7.996   | 4.869  | 1.359  | 0.942  | ENSGALT00000083335 | ENSGALG00000044866 | -       | 0.810   | 2.307   | 5.233   | 2.594   | -0.779 |
| gga-miR-449b-5p  | 7.996   | 4.869  | 1.359  | 0.942  | ENSGALT00000039811 | ENSGALG00000023772 | HSPB7   | 0.365   | 2.101   | 10.688  | 2.971   | -0.676 |
| gga-miR-449b-5p  | 7.996   | 4.869  | 1.359  | 0.942  | ENSGALT00000091351 | ENSGALG00000049119 | ZNF638  | 0.000   | 0.000   | 1.502   | 3.067   | -0.851 |
| gga-miR-449b-5p  | 7.996   | 4.869  | 1.359  | 0.942  | ENSGALT00000049654 | ENSGALG00000002377 | ENO1    | 1.811   | 13.151  | 27.773  | 11.811  | -0.748 |
| gga-miR-449b-5p  | 7.996   | 4.869  | 1.359  | 0.942  | ENSGALT00000063494 | ENSGALG00000032588 | ARPC1B  | 19.105  | 32.965  | 58.802  | 39.434  | -0.852 |
| gga-miR-449b-5p  | 7.996   | 4.869  | 1.359  | 0.942  | ENSGALT00000045265 | ENSGALG00000028520 | CST3    | 192.429 | 208.400 | 465.314 | 285.714 | -0.735 |
| gga-miR-449b-5p  | 7.996   | 4.869  | 1.359  | 0.942  | ENSGALT00000076652 | ENSGALG00000038393 | DMB2    | 10.035  | 19.697  | 26.477  | 18.703  | -0.810 |
| gga-miR-449b-5p  | 7.996   | 4.869  | 1.359  | 0.942  | ENSGALT00000045095 | ENSGALG00000048325 | GBP     | 0.336   | 1.506   | 2.353   | 2.442   | -0.993 |
| gga-miR-449b-5p  | 7.996   | 4.869  | 1.359  | 0.942  | ENSGALT00000054220 | ENSGALG00000033694 | IFI30   | 12.925  | 32.645  | 67.802  | 49.969  | -0.933 |

|                 |       |       |       |       |                    |                    |         |         |         |         |         |        |
|-----------------|-------|-------|-------|-------|--------------------|--------------------|---------|---------|---------|---------|---------|--------|
| gga-miR-449b-5p | 7.996 | 4.869 | 1.359 | 0.942 | ENSGALT00000000203 | ENSGALG00000008022 | TAPBP   | 16.005  | 27.456  | 34.611  | 31.539  | -0.954 |
| gga-miR-449b-5p | 7.996 | 4.869 | 1.359 | 0.942 | ENSGALT00000057383 | ENSGALG00000026159 | PDLIM7  | 0.097   | 0.465   | 1.677   | 0.768   | -0.799 |
| gga-miR-449b-5p | 7.996 | 4.869 | 1.359 | 0.942 | ENSGALT00000062132 | ENSGALG00000043610 | -       | 0.000   | 0.009   | 1.515   | 0.536   | -0.736 |
| gga-miR-449b-5p | 7.996 | 4.869 | 1.359 | 0.942 | ENSGALT00000081220 | ENSGALG00000026152 | -       | 4.957   | 10.320  | 14.275  | 12.658  | -0.961 |
| gga-miR-449b-5p | 7.996 | 4.869 | 1.359 | 0.942 | ENSGALT00000095657 | ENSGALG00000043373 | ARVCF   | 0.009   | 0.004   | 0.306   | 0.148   | -0.793 |
| gga-miR-449b-5p | 7.996 | 4.869 | 1.359 | 0.942 | ENSGALT00000103701 | ENSGALG00000040484 | SEC31A  | 0.000   | 0.000   | 1.304   | 0.231   | -0.619 |
| gga-miR-449b-5p | 7.996 | 4.869 | 1.359 | 0.942 | ENSGALT00000099340 | ENSGALG00000013625 | -       | 0.000   | 0.169   | 1.093   | 0.481   | -0.805 |
| gga-miR-449b-5p | 7.996 | 4.869 | 1.359 | 0.942 | ENSGALT00000003025 | ENSGALG00000001956 | OLFML3  | 6.726   | 9.117   | 17.147  | 10.572  | -0.761 |
| gga-miR-449b-5p | 7.996 | 4.869 | 1.359 | 0.942 | ENSGALT00000005163 | ENSGALG00000003261 | CAVIN1  | 84.002  | 117.874 | 239.929 | 130.746 | -0.710 |
| gga-miR-449b-5p | 7.996 | 4.869 | 1.359 | 0.942 | ENSGALT00000089897 | ENSGALG00000045671 | -       | 3.370   | 5.605   | 10.734  | 5.779   | -0.725 |
| gga-miR-449b-5p | 7.996 | 4.869 | 1.359 | 0.942 | ENSGALT00000038226 | ENSGALG00000011865 | SMTN    | 6.238   | 7.919   | 14.528  | 8.586   | -0.698 |
| gga-miR-449b-5p | 7.996 | 4.869 | 1.359 | 0.942 | ENSGALT00000012307 | ENSGALG00000007611 | RPL35A  | 223.206 | 297.753 | 521.852 | 494.983 | -0.975 |
| gga-miR-449b-5p | 7.996 | 4.869 | 1.359 | 0.942 | ENSGALT00000082983 | ENSGALG00000035498 | INPP5D  | 2.028   | 3.536   | 6.118   | 3.715   | -0.782 |
| gga-miR-449b-5p | 7.996 | 4.869 | 1.359 | 0.942 | ENSGALT00000100845 | ENSGALG00000047024 | ZNF469  | 0.414   | 0.686   | 1.566   | 0.886   | -0.789 |
| gga-miR-449b-5p | 7.996 | 4.869 | 1.359 | 0.942 | ENSGALT00000057614 | ENSGALG00000037522 | SBNO2   | 0.775   | 1.544   | 3.418   | 1.553   | -0.700 |
| gga-miR-449b-5p | 7.996 | 4.869 | 1.359 | 0.942 | ENSGALT00000060492 | ENSGALG00000042534 | NFATC1  | 0.083   | 0.850   | 1.128   | 0.558   | -0.692 |
| gga-miR-449b-5p | 7.996 | 4.869 | 1.359 | 0.942 | ENSGALT00000088232 | ENSGALG00000045584 | -       | 56.702  | 71.595  | 121.604 | 82.792  | -0.784 |
| gga-miR-449b-5p | 7.996 | 4.869 | 1.359 | 0.942 | ENSGALT00000079478 | ENSGALG00000041380 | BF2     | 55.194  | 85.931  | 129.764 | 103.967 | -0.923 |
| gga-miR-449b-5p | 7.996 | 4.869 | 1.359 | 0.942 | ENSGALT00000006250 | ENSGALG00000003923 | COL6A3  | 12.629  | 16.396  | 49.904  | 19.096  | -0.617 |
| gga-miR-449b-5p | 7.996 | 4.869 | 1.359 | 0.942 | ENSGALT00000096418 | ENSGALG00000005473 | PNAT3   | 0.000   | 0.894   | 0.886   | 2.538   | -0.801 |
| gga-miR-449b-5p | 7.996 | 4.869 | 1.359 | 0.942 | ENSGALT00000018516 | ENSGALG00000011347 | IHH     | 1.045   | 3.656   | 5.241   | 8.043   | -0.939 |
| gga-miR-449b-5p | 7.996 | 4.869 | 1.359 | 0.942 | ENSGALT00000092878 | ENSGALG00000017302 | SLCO2B1 | 1.549   | 2.803   | 5.689   | 4.409   | -0.937 |
| gga-miR-449b-5p | 7.996 | 4.869 | 1.359 | 0.942 | ENSGALT00000034529 | ENSGALG00000021395 | -       | 1.434   | 2.514   | 7.003   | 3.697   | -0.786 |
| gga-miR-449b-5p | 7.996 | 4.869 | 1.359 | 0.942 | ENSGALT00000101763 | ENSGALG00000005582 | KLHL18  | 0.001   | 0.001   | 0.271   | 0.001   | -0.490 |
| gga-miR-449b-5p | 7.996 | 4.869 | 1.359 | 0.942 | ENSGALT00000041362 | ENSGALG00000024449 | RAMP2   | 7.505   | 12.588  | 23.601  | 18.305  | -0.931 |
| gga-miR-449b-5p | 7.996 | 4.869 | 1.359 | 0.942 | ENSGALT00000088736 | ENSGALG00000011276 | BTG1    | 0.000   | 0.000   | 60.461  | 0.000   | -0.490 |
| gga-miR-449b-5p | 7.996 | 4.869 | 1.359 | 0.942 | ENSGALT00000040255 | ENSGALG00000002160 | B2M     | 148.224 | 227.047 | 409.309 | 282.319 | -0.855 |
| gga-miR-449b-5p | 7.996 | 4.869 | 1.359 | 0.942 | ENSGALT00000040078 | ENSGALG00000023872 | FAM129B | 7.059   | 13.807  | 23.642  | 19.683  | -0.962 |

|                 |          |          |          |          |                    |                    |          |         |         |         |         |        |
|-----------------|----------|----------|----------|----------|--------------------|--------------------|----------|---------|---------|---------|---------|--------|
| gga-miR-449b-5p | 7.996    | 4.869    | 1.359    | 0.942    | ENSGALT00000077631 | ENSGALG00000030602 | ADAM33   | 3.397   | 5.729   | 11.781  | 6.890   | -0.793 |
| gga-miR-449b-5p | 7.996    | 4.869    | 1.359    | 0.942    | ENSGALT00000100966 | ENSGALG00000023296 | TAL1     | 1.101   | 1.504   | 5.733   | 4.472   | -0.911 |
| gga-miR-449b-5p | 7.996    | 4.869    | 1.359    | 0.942    | ENSGALT00000064544 | ENSGALG00000042030 | P4HA3    | 0.938   | 2.181   | 4.300   | 2.568   | -0.833 |
| gga-miR-449b-5p | 7.996    | 4.869    | 1.359    | 0.942    | ENSGALT00000020749 | ENSGALG00000012710 | NCS1     | 0.937   | 1.457   | 5.468   | 1.526   | -0.583 |
| gga-miR-449b-5p | 7.996    | 4.869    | 1.359    | 0.942    | ENSGALT00000053717 | ENSGALG00000043829 | -        | 0.348   | 0.775   | 1.683   | 1.559   | -0.984 |
| gga-miR-449b-5p | 7.996    | 4.869    | 1.359    | 0.942    | ENSGALT00000068153 | ENSGALG00000040672 | IGFBP4   | 15.151  | 21.315  | 41.074  | 32.272  | -0.920 |
| gga-miR-449b-5p | 7.996    | 4.869    | 1.359    | 0.942    | ENSGALT00000094753 | ENSGALG00000015377 | PHLDB2   | 0.014   | 0.007   | 0.858   | 1.557   | -0.870 |
| gga-miR-449b-5p | 7.996    | 4.869    | 1.359    | 0.942    | ENSGALT00000091454 | ENSGALG00000051068 | -        | 1.043   | 2.925   | 4.280   | 2.154   | -0.667 |
| gga-miR-449b-5p | 7.996    | 4.869    | 1.359    | 0.942    | ENSGALT00000055268 | ENSGALG00000031546 | -        | 215.197 | 317.034 | 466.343 | 307.179 | -0.739 |
| gga-miR-449b-5p | 7.996    | 4.869    | 1.359    | 0.942    | ENSGALT00000040657 | ENSGALG00000024083 | TCIM     | 9.301   | 13.030  | 27.010  | 17.649  | -0.828 |
| gga-miR-449b-5p | 7.996    | 4.869    | 1.359    | 0.942    | ENSGALT00000100490 | ENSGALG00000053601 | LPXN     | 0.000   | 0.017   | 0.199   | 0.000   | -0.483 |
| gga-miR-449b-5p | 7.996    | 4.869    | 1.359    | 0.942    | ENSGALT00000040832 | ENSGALG00000006751 | THY1     | 2.476   | 3.735   | 7.695   | 5.463   | -0.884 |
| gga-miR-449b-5p | 7.996    | 4.869    | 1.359    | 0.942    | ENSGALT00000035122 | ENSGALG00000001573 | P2RX1    | 1.958   | 3.910   | 7.806   | 3.874   | -0.721 |
| gga-miR-449b-5p | 7.996    | 4.869    | 1.359    | 0.942    | ENSGALT00000063990 | ENSGALG00000005077 | F8       | 0.270   | 0.623   | 1.079   | 0.670   | -0.829 |
| gga-miR-449b-5p | 7.996    | 4.869    | 1.359    | 0.942    | ENSGALT00000103928 | ENSGALG00000047290 | KIAA1755 | 1.162   | 1.718   | 3.847   | 2.770   | -0.892 |
| gga-miR-449b-5p | 7.996    | 4.869    | 1.359    | 0.942    | ENSGALT00000051952 | ENSGALG00000030179 | -        | 6.701   | 10.774  | 20.226  | 15.851  | -0.932 |
| gga-miR-449b-5p | 7.996    | 4.869    | 1.359    | 0.942    | ENSGALT00000095286 | ENSGALG00000048409 | TXNIP    | 16.251  | 22.318  | 47.768  | 52.353  | -0.966 |
| gga-miR-449b-5p | 7.996    | 4.869    | 1.359    | 0.942    | ENSGALT00000090049 | ENSGALG00000000621 | KANK3    | 14.965  | 19.711  | 34.857  | 24.111  | -0.822 |
| gga-miR-449b-5p | 7.996    | 4.869    | 1.359    | 0.942    | ENSGALT00000081517 | ENSGALG00000001331 | ST14     | 0.003   | 1.783   | 0.779   | 1.383   | -0.507 |
| gga-miR-449b-5p | 7.996    | 4.869    | 1.359    | 0.942    | ENSGALT00000094484 | ENSGALG00000014155 | OGDH     | 0.000   | 0.159   | 0.132   | 0.166   | -0.808 |
| gga-miR-449b-5p | 7.996    | 4.869    | 1.359    | 0.942    | ENSGALT00000025242 | ENSGALG00000015656 | -        | 2.177   | 2.823   | 7.271   | 4.561   | -0.818 |
| gga-miR-449b-5p | 7.996    | 4.869    | 1.359    | 0.942    | ENSGALT00000031378 | ENSGALG00000019755 | -        | 0.216   | 0.542   | 1.820   | 1.368   | -0.933 |
| gga-miR-30c-5p  | 5693.654 | 2767.107 | 1946.917 | 1879.616 | ENSGALT00000097689 | ENSGALG00000003774 | ATP13A2  | 0.001   | 0.153   | 0.315   | 0.295   | -0.956 |
| gga-miR-449c-3p | 3.178    | 1.483    | 0.362    | 0.472    | ENSGALT00000084904 | ENSGALG00000045602 | REM1     | 3.791   | 5.906   | 12.033  | 6.206   | -0.744 |
| gga-miR-449c-3p | 3.178    | 1.483    | 0.362    | 0.472    | ENSGALT00000045095 | ENSGALG00000048325 | GBP      | 0.336   | 1.506   | 2.353   | 2.442   | -0.996 |
| gga-miR-449c-3p | 3.178    | 1.483    | 0.362    | 0.472    | ENSGALT00000095819 | ENSGALG00000040241 | NTRK3    | 0.000   | 0.780   | 1.302   | 0.000   | -0.494 |
| gga-miR-449c-3p | 3.178    | 1.483    | 0.362    | 0.472    | ENSGALT00000077338 | ENSGALG00000030502 | ADAMTS4  | 0.183   | 0.231   | 1.552   | 0.390   | -0.618 |
| gga-miR-449c-3p | 3.178    | 1.483    | 0.362    | 0.472    | ENSGALT00000040525 | ENSGALG00000028409 | SNRPG    | 0.000   | 11.821  | 10.060  | 0.000   | -0.357 |

|                 |       |       |       |       |                    |                    |        |        |        |        |        |        |
|-----------------|-------|-------|-------|-------|--------------------|--------------------|--------|--------|--------|--------|--------|--------|
| gga-miR-449c-3p | 3.178 | 1.483 | 0.362 | 0.472 | ENSGALT00000099821 | ENSGALG00000047283 | -      | 0.531  | 1.740  | 3.284  | 1.605  | -0.817 |
| gga-miR-449c-3p | 3.178 | 1.483 | 0.362 | 0.472 | ENSGALT00000004047 | ENSGALG00000002562 | ARAP3  | 1.645  | 2.328  | 5.511  | 2.972  | -0.762 |
| gga-miR-449c-3p | 3.178 | 1.483 | 0.362 | 0.472 | ENSGALT00000068230 | ENSGALG00000028512 | LCOR   | 0.000  | 0.713  | 0.396  | 0.314  | -0.528 |
| gga-miR-449c-3p | 3.178 | 1.483 | 0.362 | 0.472 | ENSGALT00000081220 | ENSGALG00000026152 | -      | 4.957  | 10.320 | 14.275 | 12.658 | -0.992 |
| gga-miR-449c-3p | 3.178 | 1.483 | 0.362 | 0.472 | ENSGALT00000011323 | ENSGALG00000006992 | MMP9   | 7.240  | 32.279 | 60.541 | 14.582 | -0.623 |
| gga-miR-449c-3p | 3.178 | 1.483 | 0.362 | 0.472 | ENSGALT00000023632 | ENSGALG00000014662 | RBP5   | 20.095 | 26.791 | 52.352 | 35.021 | -0.832 |
| gga-miR-449c-3p | 3.178 | 1.483 | 0.362 | 0.472 | ENSGALT00000034529 | ENSGALG00000021395 | -      | 1.434  | 2.514  | 7.003  | 3.697  | -0.801 |
| gga-miR-449c-3p | 3.178 | 1.483 | 0.362 | 0.472 | ENSGALT00000101763 | ENSGALG00000005582 | KLHL18 | 0.001  | 0.001  | 0.271  | 0.001  | -0.517 |
| gga-miR-449c-3p | 3.178 | 1.483 | 0.362 | 0.472 | ENSGALT00000057396 | ENSGALG00000031325 | TGFB1  | 5.522  | 8.927  | 14.237 | 9.964  | -0.886 |
| gga-miR-449c-3p | 3.178 | 1.483 | 0.362 | 0.472 | ENSGALT00000078625 | ENSGALG00000042227 | GNLY   | 16.877 | 31.484 | 45.924 | 33.285 | -0.915 |
| gga-miR-449c-3p | 3.178 | 1.483 | 0.362 | 0.472 | ENSGALT00000100282 | ENSGALG00000013640 | MBP    | 0.615  | 2.166  | 3.949  | 2.916  | -0.961 |
| gga-miR-449c-3p | 3.178 | 1.483 | 0.362 | 0.472 | ENSGALT00000102752 | ENSGALG00000011680 | EPHA5  | 0.000  | 0.688  | 0.370  | 0.387  | -0.588 |
| gga-miR-449c-3p | 3.178 | 1.483 | 0.362 | 0.472 | ENSGALT00000086266 | ENSGALG00000010203 | -      | 2.169  | 3.275  | 6.507  | 4.970  | -0.911 |
| gga-miR-449c-3p | 3.178 | 1.483 | 0.362 | 0.472 | ENSGALT00000060647 | ENSGALG00000003521 | TPM1   | 1.268  | 3.744  | 19.533 | 5.063  | -0.671 |
| gga-miR-449c-3p | 3.178 | 1.483 | 0.362 | 0.472 | ENSGALT00000105005 | ENSGALG00000033497 | FOXP4  | 0.000  | 0.011  | 0.435  | 0.009  | -0.533 |
| gga-miR-449c-3p | 3.178 | 1.483 | 0.362 | 0.472 | ENSGALT00000098007 | ENSGALG00000030587 | -      | 1.667  | 2.097  | 7.373  | 3.286  | -0.705 |
| gga-miR-449c-3p | 3.178 | 1.483 | 0.362 | 0.472 | ENSGALT00000091561 | ENSGALG00000002510 | IP6K1  | 0.000  | 0.274  | 0.524  | 0.350  | -0.956 |
| gga-miR-449c-3p | 3.178 | 1.483 | 0.362 | 0.472 | ENSGALT00000036371 | ENSGALG00000028273 | HBE1   | 0.000  | 0.044  | 0.581  | 0.216  | -0.752 |
| gga-miR-449c-3p | 3.178 | 1.483 | 0.362 | 0.472 | ENSGALT00000090049 | ENSGALG00000000621 | KANK3  | 14.965 | 19.711 | 34.857 | 24.111 | -0.838 |
| gga-miR-449c-3p | 3.178 | 1.483 | 0.362 | 0.472 | ENSGALT00000075410 | ENSGALG00000003353 | RAI14  | 0.957  | 1.126  | 6.569  | 2.892  | -0.726 |
| gga-miR-449c-3p | 3.178 | 1.483 | 0.362 | 0.472 | ENSGALT00000102497 | ENSGALG00000004918 | RAB9B  | 0.002  | 1.619  | 3.106  | 3.120  | -0.994 |
| gga-miR-449c-3p | 3.178 | 1.483 | 0.362 | 0.472 | ENSGALT00000081183 | ENSGALG00000032220 | ELN    | 1.706  | 5.807  | 8.190  | 5.272  | -0.890 |
| gga-miR-449c-3p | 3.178 | 1.483 | 0.362 | 0.472 | ENSGALT00000099432 | ENSGALG00000042254 | -      | 0.000  | 13.732 | 7.880  | 3.205  | -0.401 |
| gga-miR-449c-3p | 3.178 | 1.483 | 0.362 | 0.472 | ENSGALT00000040550 | ENSGALG00000024034 | PI4KB  | 0.011  | 0.014  | 3.142  | 1.409  | -0.762 |
| gga-miR-449c-3p | 3.178 | 1.483 | 0.362 | 0.472 | ENSGALT00000018516 | ENSGALG00000011347 | IHH    | 1.045  | 3.656  | 5.241  | 8.043  | -0.896 |
| gga-miR-449c-3p | 3.178 | 1.483 | 0.362 | 0.472 | ENSGALT00000068365 | ENSGALG00000001749 | ACSBG2 | 0.027  | 17.593 | 11.362 | 8.072  | -0.587 |
| gga-miR-449c-3p | 3.178 | 1.483 | 0.362 | 0.472 | ENSGALT00000062206 | ENSGALG00000036498 | EHD2   | 4.789  | 6.502  | 12.774 | 5.647  | -0.610 |
| gga-miR-449c-3p | 3.178 | 1.483 | 0.362 | 0.472 | ENSGALT00000091454 | ENSGALG00000051068 | -      | 1.043  | 2.925  | 4.280  | 2.154  | -0.765 |



|                 |         |        |        |        |                    |                    |          |        |        |         |        |        |
|-----------------|---------|--------|--------|--------|--------------------|--------------------|----------|--------|--------|---------|--------|--------|
| gga-miR-449c-3p | 3.178   | 1.483  | 0.362  | 0.472  | ENSGALT00000052260 | ENSGALG00000037869 | -        | 1.792  | 2.110  | 7.448   | 3.357  | -0.697 |
| gga-miR-449c-3p | 3.178   | 1.483  | 0.362  | 0.472  | ENSGALT00000059672 | ENSGALG00000031094 | EDA2R    | 3.582  | 5.661  | 9.884   | 6.899  | -0.886 |
| gga-miR-449c-3p | 3.178   | 1.483  | 0.362  | 0.472  | ENSGALT00000100490 | ENSGALG00000053601 | LPXN     | 0.000  | 0.017  | 0.199   | 0.000  | -0.526 |
| gga-miR-449c-3p | 3.178   | 1.483  | 0.362  | 0.472  | ENSGALT00000070640 | ENSGALG00000040847 | EDQM3    | 0.000  | 0.000  | 6.230   | 0.000  | -0.517 |
| gga-miR-449c-3p | 3.178   | 1.483  | 0.362  | 0.472  | ENSGALT00000026763 | ENSGALG00000016580 | SCARA5   | 0.801  | 2.072  | 4.507   | 2.277  | -0.820 |
| gga-miR-449c-3p | 3.178   | 1.483  | 0.362  | 0.472  | ENSGALT00000072324 | ENSGALG00000037540 | PLEKHO1  | 1.133  | 3.485  | 6.803   | 4.505  | -0.926 |
| gga-miR-449c-3p | 3.178   | 1.483  | 0.362  | 0.472  | ENSGALT00000075176 | ENSGALG00000005204 | -        | 0.000  | 0.000  | 0.763   | 0.000  | -0.517 |
| gga-miR-130b-5p | 6.137   | 5.208  | 1.683  | 1.839  | ENSGALT00000018516 | ENSGALG00000011347 | IHH      | 1.045  | 3.656  | 5.241   | 8.043  | -0.883 |
| gga-miR-130b-5p | 6.137   | 5.208  | 1.683  | 1.839  | ENSGALT00000022043 | ENSGALG00000013537 | TPM3     | 1.022  | 2.138  | 6.816   | 2.447  | -0.731 |
| gga-miR-130b-5p | 6.137   | 5.208  | 1.683  | 1.839  | ENSGALT00000038226 | ENSGALG00000011865 | SMTN     | 6.238  | 7.919  | 14.528  | 8.586  | -0.756 |
| gga-miR-130b-5p | 6.137   | 5.208  | 1.683  | 1.839  | ENSGALT00000043246 | ENSGALG00000029024 | TCF21    | 19.709 | 25.722 | 43.483  | 45.137 | -0.996 |
| gga-miR-130b-5p | 6.137   | 5.208  | 1.683  | 1.839  | ENSGALT00000068230 | ENSGALG00000028512 | LCOR     | 0.000  | 0.713  | 0.396   | 0.314  | -0.165 |
| gga-miR-130b-5p | 6.137   | 5.208  | 1.683  | 1.839  | ENSGALT00000064061 | ENSGALG00000040055 | -        | 0.073  | 1.134  | 2.727   | 1.717  | -0.905 |
| gga-miR-130b-5p | 6.137   | 5.208  | 1.683  | 1.839  | ENSGALT00000095657 | ENSGALG00000043373 | ARVCF    | 0.009  | 0.004  | 0.306   | 0.148  | -0.889 |
| gga-miR-130b-5p | 6.137   | 5.208  | 1.683  | 1.839  | ENSGALT00000102380 | ENSGALG00000008725 | KIF16B   | 0.000  | 0.101  | 0.264   | 0.000  | -0.451 |
| gga-miR-130b-5p | 6.137   | 5.208  | 1.683  | 1.839  | ENSGALT00000018446 | ENSGALG00000011306 | DES      | 27.266 | 73.695 | 266.779 | 88.525 | -0.738 |
| gga-miR-130b-5p | 6.137   | 5.208  | 1.683  | 1.839  | ENSGALT00000097062 | ENSGALG00000004189 | MAFK     | 0.051  | 0.709  | 1.377   | 0.358  | -0.586 |
| gga-miR-138-5p  | 11.765  | 6.384  | 2.718  | 2.661  | ENSGALT00000000424 | ENSGALG00000000318 | CSRP1    | 28.182 | 48.476 | 112.192 | 58.500 | -0.765 |
| gga-miR-2954    | 138.000 | 85.274 | 40.809 | 38.254 | ENSGALT00000065171 | ENSGALG00000041634 | ACTG2    | 2.957  | 19.227 | 100.269 | 23.366 | -0.653 |
| gga-miR-2954    | 138.000 | 85.274 | 40.809 | 38.254 | ENSGALT00000093973 | ENSGALG00000054718 | FLNA     | 5.301  | 8.420  | 13.442  | 5.810  | -0.519 |
| gga-miR-2954    | 138.000 | 85.274 | 40.809 | 38.254 | ENSGALT00000105703 | ENSGALG00000040351 | ACAP1    | 0.000  | 0.173  | 0.189   | 0.223  | -0.943 |
| gga-miR-2954    | 138.000 | 85.274 | 40.809 | 38.254 | ENSGALT00000107116 | ENSGALG00000003601 | ATP2B4   | 0.000  | 0.662  | 1.826   | 1.436  | -0.968 |
| gga-miR-2954    | 138.000 | 85.274 | 40.809 | 38.254 | ENSGALT00000075592 | ENSGALG00000038399 | PLEKHA6  | 0.004  | 0.032  | 0.506   | 0.292  | -0.838 |
| gga-miR-2954    | 138.000 | 85.274 | 40.809 | 38.254 | ENSGALT00000094904 | ENSGALG00000054971 | ARHGAP30 | 1.304  | 2.328  | 3.862   | 2.583  | -0.857 |
| gga-miR-2954    | 138.000 | 85.274 | 40.809 | 38.254 | ENSGALT00000080565 | ENSGALG00000038458 | LOXL1    | 0.582  | 1.410  | 4.554   | 0.458  | -0.466 |
| gga-miR-2954    | 138.000 | 85.274 | 40.809 | 38.254 | ENSGALT00000046726 | ENSGALG00000041266 | CNN1     | 0.642  | 3.650  | 53.923  | 8.519  | -0.601 |
| gga-miR-2954    | 138.000 | 85.274 | 40.809 | 38.254 | ENSGALT00000057614 | ENSGALG00000037522 | SBNO2    | 0.775  | 1.544  | 3.418   | 1.553  | -0.718 |
| gga-miR-2954    | 138.000 | 85.274 | 40.809 | 38.254 | ENSGALT00000095286 | ENSGALG00000048409 | TXNIP    | 16.251 | 22.318 | 47.768  | 52.353 | -0.940 |

|                 |         |         |        |        |                    |                    |         |        |        |         |         |        |
|-----------------|---------|---------|--------|--------|--------------------|--------------------|---------|--------|--------|---------|---------|--------|
| gga-miR-2954    | 138.000 | 85.274  | 40.809 | 38.254 | ENSGALT00000090049 | ENSGALG00000000621 | KANK3   | 14.965 | 19.711 | 34.857  | 24.111  | -0.826 |
| gga-miR-2954    | 138.000 | 85.274  | 40.809 | 38.254 | ENSGALT00000095819 | ENSGALG00000040241 | NTRK3   | 0.000  | 0.780  | 1.302   | 0.000   | -0.421 |
| gga-miR-2954    | 138.000 | 85.274  | 40.809 | 38.254 | ENSGALT00000080170 | ENSGALG00000043754 | GLUL    | 14.719 | 19.120 | 32.486  | 28.335  | -0.943 |
| gga-miR-2954    | 138.000 | 85.274  | 40.809 | 38.254 | ENSGALT00000103185 | ENSGALG00000025842 | BRT-1   | 0.392  | 0.181  | 14.275  | 7.377   | -0.791 |
| gga-miR-2954    | 138.000 | 85.274  | 40.809 | 38.254 | ENSGALT00000100475 | ENSGALG00000040465 | ZEB2    | 8.810  | 10.431 | 19.197  | 13.027  | -0.784 |
| gga-miR-2954    | 138.000 | 85.274  | 40.809 | 38.254 | ENSGALT00000053904 | ENSGALG00000005105 | TPR     | 2.606  | 5.833  | 7.829   | 5.642   | -0.870 |
| gga-miR-2954    | 138.000 | 85.274  | 40.809 | 38.254 | ENSGALT00000075454 | ENSGALG00000040759 | CPXM1   | 1.199  | 1.568  | 4.609   | 2.346   | -0.734 |
| gga-miR-2954    | 138.000 | 85.274  | 40.809 | 38.254 | ENSGALT00000096902 | ENSGALG00000055101 | TASOR2  | 0.000  | 0.354  | 0.408   | 0.427   | -0.947 |
| gga-miR-2954    | 138.000 | 85.274  | 40.809 | 38.254 | ENSGALT00000007813 | ENSGALG00000004893 | TMEM119 | 8.040  | 12.268 | 22.479  | 12.515  | -0.729 |
| gga-miR-2954    | 138.000 | 85.274  | 40.809 | 38.254 | ENSGALT00000094484 | ENSGALG00000014155 | OGDH    | 0.000  | 0.159  | 0.132   | 0.166   | -0.848 |
| gga-miR-2954    | 138.000 | 85.274  | 40.809 | 38.254 | ENSGALT00000097689 | ENSGALG00000003774 | ATP13A2 | 0.001  | 0.153  | 0.315   | 0.295   | -0.996 |
| gga-miR-2954    | 138.000 | 85.274  | 40.809 | 38.254 | ENSGALT00000079478 | ENSGALG00000041380 | BF2     | 55.194 | 85.931 | 129.764 | 103.967 | -0.933 |
| gga-miR-2954    | 138.000 | 85.274  | 40.809 | 38.254 | ENSGALT00000100966 | ENSGALG00000023296 | TAL1    | 1.101  | 1.504  | 5.733   | 4.472   | -0.891 |
| gga-miR-217-5p  | 8.117   | 8.851   | 0.819  | 2.460  | ENSGALT00000099263 | ENSGALG00000009587 | GPHN    | 0.000  | 0.004  | 0.426   | 0.081   | -0.821 |
| gga-miR-217-5p  | 8.117   | 8.851   | 0.819  | 2.460  | ENSGALT00000012260 | ENSGALG00000007582 | DPYSL3  | 9.796  | 14.033 | 20.795  | 17.596  | -0.893 |
| gga-miR-217-5p  | 8.117   | 8.851   | 0.819  | 2.460  | ENSGALT00000100282 | ENSGALG00000013640 | MBP     | 0.615  | 2.166  | 3.949   | 2.916   | -0.843 |
| gga-miR-6660-3p | 14.087  | 8.707   | 3.411  | 4.120  | ENSGALT00000071222 | ENSGALG00000041140 | HTRA1   | 10.591 | 17.051 | 45.914  | 34.066  | -0.930 |
| gga-miR-6660-3p | 14.087  | 8.707   | 3.411  | 4.120  | ENSGALT00000076956 | ENSGALG00000009655 | AADAT   | 0.000  | 2.872  | 1.914   | 5.486   | -0.703 |
| gga-miR-6660-3p | 14.087  | 8.707   | 3.411  | 4.120  | ENSGALT00000036256 | ENSGALG00000005678 | FLNB    | 3.900  | 4.577  | 8.811   | 5.022   | -0.724 |
| gga-miR-6660-3p | 14.087  | 8.707   | 3.411  | 4.120  | ENSGALT00000095198 | ENSGALG00000053511 | APOLD1  | 3.515  | 5.991  | 10.967  | 5.670   | -0.767 |
| gga-miR-6660-3p | 14.087  | 8.707   | 3.411  | 4.120  | ENSGALT00000038637 | ENSGALG00000009870 | IL15    | 6.888  | 8.619  | 21.182  | 13.546  | -0.852 |
| gga-miR-6660-3p | 14.087  | 8.707   | 3.411  | 4.120  | ENSGALT00000099821 | ENSGALG00000047283 | -       | 0.531  | 1.740  | 3.284   | 1.605   | -0.825 |
| gga-miR-6660-3p | 14.087  | 8.707   | 3.411  | 4.120  | ENSGALT00000048133 | ENSGALG00000016289 | DST     | 0.000  | 0.000  | 1.503   | 0.224   | -0.659 |
| gga-miR-6660-3p | 14.087  | 8.707   | 3.411  | 4.120  | ENSGALT00000023206 | ENSGALG00000014365 | RBPJ    | 0.005  | 0.021  | 1.159   | 0.022   | -0.574 |
| gga-miR-6660-3p | 14.087  | 8.707   | 3.411  | 4.120  | ENSGALT00000103185 | ENSGALG00000025842 | BRT-1   | 0.392  | 0.181  | 14.275  | 7.377   | -0.830 |
| gga-miR-6660-3p | 14.087  | 8.707   | 3.411  | 4.120  | ENSGALT00000102330 | ENSGALG00000029536 | VPS11   | 0.003  | 0.004  | 5.461   | 0.002   | -0.564 |
| gga-miR-6660-3p | 14.087  | 8.707   | 3.411  | 4.120  | ENSGALT00000000203 | ENSGALG00000008022 | TAPBP   | 16.005 | 27.456 | 34.611  | 31.539  | -0.983 |
| gga-miR-458a-3p | 221.124 | 128.526 | 49.547 | 58.280 | ENSGALT00000061435 | ENSGALG00000032736 | MGLL    | 5.969  | 8.026  | 20.631  | 12.696  | -0.837 |

|                 |        |       |       |       |                    |                    |          |         |         |         |         |        |
|-----------------|--------|-------|-------|-------|--------------------|--------------------|----------|---------|---------|---------|---------|--------|
| gga-miR-449c-5p | 10.423 | 3.526 | 1.891 | 1.095 | ENSGALT00000034529 | ENSGALG00000021395 | -        | 1.434   | 2.514   | 7.003   | 3.697   | -0.680 |
| gga-miR-449c-5p | 10.423 | 3.526 | 1.891 | 1.095 | ENSGALT00000101763 | ENSGALG00000005582 | KLHL18   | 0.001   | 0.001   | 0.271   | 0.001   | -0.368 |
| gga-miR-449c-5p | 10.423 | 3.526 | 1.891 | 1.095 | ENSGALT00000092878 | ENSGALG00000017302 | SLCO2B1  | 1.549   | 2.803   | 5.689   | 4.409   | -0.847 |
| gga-miR-449c-5p | 10.423 | 3.526 | 1.891 | 1.095 | ENSGALT00000041362 | ENSGALG00000024449 | RAMP2    | 7.505   | 12.588  | 23.601  | 18.305  | -0.846 |
| gga-miR-449c-5p | 10.423 | 3.526 | 1.891 | 1.095 | ENSGALT00000088736 | ENSGALG00000011276 | BTG1     | 0.000   | 0.000   | 60.461  | 0.000   | -0.368 |
| gga-miR-449c-5p | 10.423 | 3.526 | 1.891 | 1.095 | ENSGALT00000040255 | ENSGALG00000002160 | B2M      | 148.224 | 227.047 | 409.309 | 282.319 | -0.777 |
| gga-miR-449c-5p | 10.423 | 3.526 | 1.891 | 1.095 | ENSGALT00000053717 | ENSGALG00000043829 | -        | 0.348   | 0.775   | 1.683   | 1.559   | -0.889 |
| gga-miR-449c-5p | 10.423 | 3.526 | 1.891 | 1.095 | ENSGALT00000064544 | ENSGALG00000042030 | P4HA3    | 0.938   | 2.181   | 4.300   | 2.568   | -0.784 |
| gga-miR-449c-5p | 10.423 | 3.526 | 1.891 | 1.095 | ENSGALT00000020749 | ENSGALG00000012710 | NCS1     | 0.937   | 1.457   | 5.468   | 1.526   | -0.480 |
| gga-miR-449c-5p | 10.423 | 3.526 | 1.891 | 1.095 | ENSGALT00000091454 | ENSGALG00000051068 | -        | 1.043   | 2.925   | 4.280   | 2.154   | -0.715 |
| gga-miR-449c-5p | 10.423 | 3.526 | 1.891 | 1.095 | ENSGALT00000100490 | ENSGALG00000053601 | LPXN     | 0.000   | 0.017   | 0.199   | 0.000   | -0.387 |
| gga-miR-449c-5p | 10.423 | 3.526 | 1.891 | 1.095 | ENSGALT00000055268 | ENSGALG00000031546 | -        | 215.197 | 317.034 | 466.343 | 307.179 | -0.717 |
| gga-miR-449c-5p | 10.423 | 3.526 | 1.891 | 1.095 | ENSGALT00000040657 | ENSGALG00000024083 | TCIM     | 9.301   | 13.030  | 27.010  | 17.649  | -0.722 |
| gga-miR-449c-5p | 10.423 | 3.526 | 1.891 | 1.095 | ENSGALT00000003855 | ENSGALG00000025945 | AVD      | 4.903   | 28.783  | 146.481 | 13.494  | -0.446 |
| gga-miR-449c-5p | 10.423 | 3.526 | 1.891 | 1.095 | ENSGALT00000068153 | ENSGALG00000040672 | IGFBP4   | 15.151  | 21.315  | 41.074  | 32.272  | -0.810 |
| gga-miR-449c-5p | 10.423 | 3.526 | 1.891 | 1.095 | ENSGALT00000022669 | ENSGALG00000013993 | VNN1     | 10.548  | 13.294  | 27.842  | 20.720  | -0.750 |
| gga-miR-449c-5p | 10.423 | 3.526 | 1.891 | 1.095 | ENSGALT00000059778 | ENSGALG00000002335 | DOCK3    | 0.000   | 0.000   | 0.357   | 0.121   | -0.567 |
| gga-miR-449c-5p | 10.423 | 3.526 | 1.891 | 1.095 | ENSGALT00000063990 | ENSGALG00000005077 | F8       | 0.270   | 0.623   | 1.079   | 0.670   | -0.806 |
| gga-miR-449c-5p | 10.423 | 3.526 | 1.891 | 1.095 | ENSGALT00000075176 | ENSGALG00000005204 | -        | 0.000   | 0.000   | 0.763   | 0.000   | -0.368 |
| gga-miR-449c-5p | 10.423 | 3.526 | 1.891 | 1.095 | ENSGALT00000095034 | ENSGALG00000013031 | ADA2     | 0.000   | 0.000   | 1.128   | 0.695   | -0.682 |
| gga-miR-449c-5p | 10.423 | 3.526 | 1.891 | 1.095 | ENSGALT00000099703 | ENSGALG00000015573 | FHL5     | 2.929   | 4.503   | 8.192   | 9.779   | -0.863 |
| gga-miR-449c-5p | 10.423 | 3.526 | 1.891 | 1.095 | ENSGALT00000095286 | ENSGALG00000048409 | TXNIP    | 16.251  | 22.318  | 47.768  | 52.353  | -0.833 |
| gga-miR-449c-5p | 10.423 | 3.526 | 1.891 | 1.095 | ENSGALT00000103928 | ENSGALG00000047290 | KIAA1755 | 1.162   | 1.718   | 3.847   | 2.770   | -0.776 |
| gga-miR-449c-5p | 10.423 | 3.526 | 1.891 | 1.095 | ENSGALT00000025242 | ENSGALG00000015656 | -        | 2.177   | 2.823   | 7.271   | 4.561   | -0.685 |
| gga-miR-449c-5p | 10.423 | 3.526 | 1.891 | 1.095 | ENSGALT00000036373 | ENSGALG00000047152 | HBBA     | 70.218  | 115.320 | 220.605 | 246.446 | -0.876 |
| gga-miR-449c-5p | 10.423 | 3.526 | 1.891 | 1.095 | ENSGALT00000040533 | ENSGALG00000004594 | Ii       | 89.087  | 177.920 | 287.842 | 212.679 | -0.872 |
| gga-miR-449c-5p | 10.423 | 3.526 | 1.891 | 1.095 | ENSGALT00000039811 | ENSGALG00000023772 | HSPB7    | 0.365   | 2.101   | 10.688  | 2.971   | -0.577 |
| gga-miR-449c-5p | 10.423 | 3.526 | 1.891 | 1.095 | ENSGALT00000049654 | ENSGALG00000002377 | ENO1     | 1.811   | 13.151  | 27.773  | 11.811  | -0.735 |

|                 |         |        |        |        |                    |                    |        |         |         |         |         |        |
|-----------------|---------|--------|--------|--------|--------------------|--------------------|--------|---------|---------|---------|---------|--------|
| gga-miR-449c-5p | 10.423  | 3.526  | 1.891  | 1.095  | ENSGALT00000091351 | ENSGALG00000049119 | ZNF638 | 0.000   | 0.000   | 1.502   | 3.067   | -0.704 |
| gga-miR-449c-5p | 10.423  | 3.526  | 1.891  | 1.095  | ENSGALT00000022043 | ENSGALG00000013537 | TPM3   | 1.022   | 2.138   | 6.816   | 2.447   | -0.580 |
| gga-miR-449c-5p | 10.423  | 3.526  | 1.891  | 1.095  | ENSGALT00000083335 | ENSGALG00000044866 | -      | 0.810   | 2.307   | 5.233   | 2.594   | -0.726 |
| gga-miR-449c-5p | 10.423  | 3.526  | 1.891  | 1.095  | ENSGALT00000045095 | ENSGALG00000048325 | GBP    | 0.336   | 1.506   | 2.353   | 2.442   | -0.976 |
| gga-miR-449c-5p | 10.423  | 3.526  | 1.891  | 1.095  | ENSGALT00000054220 | ENSGALG00000033694 | IFI30  | 12.925  | 32.645  | 67.802  | 49.969  | -0.864 |
| gga-miR-449c-5p | 10.423  | 3.526  | 1.891  | 1.095  | ENSGALT00000061435 | ENSGALG00000032736 | MGLL   | 5.969   | 8.026   | 20.631  | 12.696  | -0.686 |
| gga-miR-449c-5p | 10.423  | 3.526  | 1.891  | 1.095  | ENSGALT00000063494 | ENSGALG00000032588 | ARPC1B | 19.105  | 32.965  | 58.802  | 39.434  | -0.792 |
| gga-miR-449c-5p | 10.423  | 3.526  | 1.891  | 1.095  | ENSGALT00000076652 | ENSGALG00000038393 | DMB2   | 10.035  | 19.697  | 26.477  | 18.703  | -0.844 |
| gga-miR-449c-5p | 10.423  | 3.526  | 1.891  | 1.095  | ENSGALT00000045265 | ENSGALG00000028520 | CST3   | 192.429 | 208.400 | 465.314 | 285.714 | -0.592 |
| gga-miR-449c-5p | 10.423  | 3.526  | 1.891  | 1.095  | ENSGALT00000081220 | ENSGALG00000026152 | -      | 4.957   | 10.320  | 14.275  | 12.658  | -0.960 |
| gga-miR-449c-5p | 10.423  | 3.526  | 1.891  | 1.095  | ENSGALT00000000203 | ENSGALG00000008022 | TAPBP  | 16.005  | 27.456  | 34.611  | 31.539  | -0.968 |
| gga-miR-449c-5p | 10.423  | 3.526  | 1.891  | 1.095  | ENSGALT00000057383 | ENSGALG00000026159 | PDLIM7 | 0.097   | 0.465   | 1.677   | 0.768   | -0.705 |
| gga-miR-449c-5p | 10.423  | 3.526  | 1.891  | 1.095  | ENSGALT00000103701 | ENSGALG00000040484 | SEC31A | 0.000   | 0.000   | 1.304   | 0.231   | -0.476 |
| gga-miR-449c-5p | 10.423  | 3.526  | 1.891  | 1.095  | ENSGALT00000082983 | ENSGALG00000035498 | INPP5D | 2.028   | 3.536   | 6.118   | 3.715   | -0.740 |
| gga-miR-449c-5p | 10.423  | 3.526  | 1.891  | 1.095  | ENSGALT00000038226 | ENSGALG00000011865 | SMTN   | 6.238   | 7.919   | 14.528  | 8.586   | -0.608 |
| gga-miR-449c-5p | 10.423  | 3.526  | 1.891  | 1.095  | ENSGALT00000003025 | ENSGALG00000001956 | OLFML3 | 6.726   | 9.117   | 17.147  | 10.572  | -0.671 |
| gga-miR-449c-5p | 10.423  | 3.526  | 1.891  | 1.095  | ENSGALT00000005163 | ENSGALG00000003261 | CAVIN1 | 84.002  | 117.874 | 239.929 | 130.746 | -0.623 |
| gga-miR-449c-5p | 10.423  | 3.526  | 1.891  | 1.095  | ENSGALT00000081507 | ENSGALG00000035856 | CD48   | 5.820   | 11.443  | 20.748  | 13.898  | -0.816 |
| gga-miR-449c-5p | 10.423  | 3.526  | 1.891  | 1.095  | ENSGALT00000089897 | ENSGALG00000045671 | -      | 3.370   | 5.605   | 10.734  | 5.779   | -0.666 |
| gga-miR-449c-5p | 10.423  | 3.526  | 1.891  | 1.095  | ENSGALT00000057614 | ENSGALG00000037522 | SBNO2  | 0.775   | 1.544   | 3.418   | 1.553   | -0.640 |
| gga-miR-449c-5p | 10.423  | 3.526  | 1.891  | 1.095  | ENSGALT00000100845 | ENSGALG00000047024 | ZNF469 | 0.414   | 0.686   | 1.566   | 0.886   | -0.698 |
| gga-miR-449c-5p | 10.423  | 3.526  | 1.891  | 1.095  | ENSGALT00000006250 | ENSGALG00000003923 | COL6A3 | 12.629  | 16.396  | 49.904  | 19.096  | -0.505 |
| gga-miR-449c-5p | 10.423  | 3.526  | 1.891  | 1.095  | ENSGALT00000018516 | ENSGALG00000011347 | IHH    | 1.045   | 3.656   | 5.241   | 8.043   | -0.901 |
| gga-miR-449c-5p | 10.423  | 3.526  | 1.891  | 1.095  | ENSGALT00000088232 | ENSGALG00000045584 | -      | 56.702  | 71.595  | 121.604 | 82.792  | -0.691 |
| gga-miR-449c-5p | 10.423  | 3.526  | 1.891  | 1.095  | ENSGALT00000039224 | ENSGALG00000006775 | TGM2   | 40.583  | 72.549  | 130.117 | 77.749  | -0.738 |
| gga-miR-449c-5p | 10.423  | 3.526  | 1.891  | 1.095  | ENSGALT00000079478 | ENSGALG00000041380 | BF2    | 55.194  | 85.931  | 129.764 | 103.967 | -0.875 |
| gga-miR-449d-5p | 107.422 | 57.048 | 18.984 | 20.620 | ENSGALT00000093583 | ENSGALG00000031440 | PTPRU  | 0.000   | 0.261   | 0.662   | 0.441   | -0.947 |
| gga-miR-449d-5p | 107.422 | 57.048 | 18.984 | 20.620 | ENSGALT00000068153 | ENSGALG00000040672 | IGFBP4 | 15.151  | 21.315  | 41.074  | 32.272  | -0.916 |

|                 |         |        |        |        |                    |                    |         |         |         |         |         |        |
|-----------------|---------|--------|--------|--------|--------------------|--------------------|---------|---------|---------|---------|---------|--------|
| gga-miR-449d-5p | 107.422 | 57.048 | 18.984 | 20.620 | ENSGALT00000054220 | ENSGALG00000033694 | IFI30   | 12.925  | 32.645  | 67.802  | 49.969  | -0.945 |
| gga-miR-449d-5p | 107.422 | 57.048 | 18.984 | 20.620 | ENSGALT00000055268 | ENSGALG00000031546 | -       | 215.197 | 317.034 | 466.343 | 307.179 | -0.790 |
| gga-miR-449d-5p | 107.422 | 57.048 | 18.984 | 20.620 | ENSGALT00000045095 | ENSGALG00000048325 | GBP     | 0.336   | 1.506   | 2.353   | 2.442   | -0.999 |
| gga-miR-449d-5p | 107.422 | 57.048 | 18.984 | 20.620 | ENSGALT00000034529 | ENSGALG00000021395 | -       | 1.434   | 2.514   | 7.003   | 3.697   | -0.802 |
| gga-miR-449d-5p | 107.422 | 57.048 | 18.984 | 20.620 | ENSGALT00000081517 | ENSGALG00000001331 | ST14    | 0.003   | 1.783   | 0.779   | 1.383   | -0.581 |
| gga-miR-449d-5p | 107.422 | 57.048 | 18.984 | 20.620 | ENSGALT00000000203 | ENSGALG00000008022 | TAPBP   | 16.005  | 27.456  | 34.611  | 31.539  | -0.985 |
| gga-miR-449d-5p | 107.422 | 57.048 | 18.984 | 20.620 | ENSGALT00000025242 | ENSGALG00000015656 | -       | 2.177   | 2.823   | 7.271   | 4.561   | -0.818 |
| gga-miR-6634-5p | 2.092   | 1.515  | 0.135  | 0.786  | ENSGALT00000091454 | ENSGALG00000051068 | -       | 1.043   | 2.925   | 4.280   | 2.154   | -0.831 |
| gga-miR-6634-5p | 2.092   | 1.515  | 0.135  | 0.786  | ENSGALT00000093100 | ENSGALG00000003283 | -       | 0.775   | 1.224   | 3.711   | 2.059   | -0.967 |
| gga-miR-6634-5p | 2.092   | 1.515  | 0.135  | 0.786  | ENSGALT00000046863 | ENSGALG00000007186 | TMEM268 | 1.214   | 3.264   | 7.684   | 4.670   | -0.987 |
| gga-miR-6634-5p | 2.092   | 1.515  | 0.135  | 0.786  | ENSGALT00000075592 | ENSGALG00000038399 | PLEKHA6 | 0.004   | 0.032   | 0.506   | 0.292   | -0.972 |
| gga-miR-6634-5p | 2.092   | 1.515  | 0.135  | 0.786  | ENSGALT00000050214 | ENSGALG00000007623 | CACNA1G | 0.000   | 0.312   | 0.259   | 0.000   | -0.326 |
| gga-miR-6634-5p | 2.092   | 1.515  | 0.135  | 0.786  | ENSGALT00000011727 | ENSGALG00000007247 | PXN     | 0.001   | 1.756   | 3.481   | 0.823   | -0.806 |
| gga-miR-6634-5p | 2.092   | 1.515  | 0.135  | 0.786  | ENSGALT00000043563 | ENSGALG00000026970 | IFITM3  | 69.387  | 139.419 | 175.233 | 101.263 | -0.763 |
| gga-miR-6634-5p | 2.092   | 1.515  | 0.135  | 0.786  | ENSGALT00000038226 | ENSGALG00000011865 | SMTN    | 6.238   | 7.919   | 14.528  | 8.586   | -0.913 |
| gga-miR-6634-5p | 2.092   | 1.515  | 0.135  | 0.786  | ENSGALT00000022043 | ENSGALG00000013537 | TPM3    | 1.022   | 2.138   | 6.816   | 2.447   | -0.999 |
| gga-miR-6634-5p | 2.092   | 1.515  | 0.135  | 0.786  | ENSGALT00000086266 | ENSGALG00000010203 | -       | 2.169   | 3.275   | 6.507   | 4.970   | -0.779 |
| gga-miR-6634-5p | 2.092   | 1.515  | 0.135  | 0.786  | ENSGALT00000070640 | ENSGALG00000040847 | EDQM3   | 0.000   | 0.000   | 6.230   | 0.000   | -0.862 |
| gga-miR-6634-5p | 2.092   | 1.515  | 0.135  | 0.786  | ENSGALT00000039564 | ENSGALG00000023689 | ASS1    | 5.534   | 13.484  | 19.700  | 10.967  | -0.961 |
| gga-miR-6634-5p | 2.092   | 1.515  | 0.135  | 0.786  | ENSGALT00000020568 | ENSGALG00000012594 | NTRK2   | 0.519   | 1.008   | 2.902   | 1.500   | -0.999 |
| gga-miR-6634-5p | 2.092   | 1.515  | 0.135  | 0.786  | ENSGALT00000007990 | ENSGALG00000004986 | CERCAM  | 1.935   | 2.921   | 5.683   | 4.467   | -0.922 |
| gga-miR-6634-5p | 2.092   | 1.515  | 0.135  | 0.786  | ENSGALT00000030235 | ENSGALG00000016785 | IL1RL1  | 5.168   | 6.172   | 13.467  | 7.665   | -0.952 |
| gga-miR-6634-5p | 2.092   | 1.515  | 0.135  | 0.786  | ENSGALT00000103185 | ENSGALG00000025842 | BRT-1   | 0.392   | 0.181   | 14.275  | 7.377   | -0.912 |
| gga-miR-6634-5p | 2.092   | 1.515  | 0.135  | 0.786  | ENSGALT00000084904 | ENSGALG00000045602 | REM1    | 3.791   | 5.906   | 12.033  | 6.206   | -0.929 |
| gga-miR-6634-5p | 2.092   | 1.515  | 0.135  | 0.786  | ENSGALT00000054874 | ENSGALG00000014784 | MAST4   | 0.514   | 2.491   | 4.483   | 2.397   | -0.990 |
| gga-miR-6634-5p | 2.092   | 1.515  | 0.135  | 0.786  | ENSGALT00000044551 | ENSGALG00000026891 | NINJ1   | 4.369   | 5.886   | 12.100  | 8.629   | -0.307 |
| gga-miR-6634-5p | 2.092   | 1.515  | 0.135  | 0.786  | ENSGALT00000068230 | ENSGALG00000028512 | LCOR    | 0.000   | 0.713   | 0.396   | 0.314   | -0.934 |
| gga-miR-6634-5p | 2.092   | 1.515  | 0.135  | 0.786  | ENSGALT00000075454 | ENSGALG00000040759 | CPXM1   | 1.199   | 1.568   | 4.609   | 2.346   | -0.913 |

|                 |           |           |          |          |                    |                    |          |         |         |         |         |        |
|-----------------|-----------|-----------|----------|----------|--------------------|--------------------|----------|---------|---------|---------|---------|--------|
| gga-miR-6634-5p | 2.092     | 1.515     | 0.135    | 0.786    | ENSGALT00000100937 | ENSGALG00000052892 | -        | 0.280   | 1.030   | 4.678   | 1.507   | -0.963 |
| gga-miR-6634-5p | 2.092     | 1.515     | 0.135    | 0.786    | ENSGALT00000009457 | ENSGALG00000005884 | MAPKKK3L | 7.455   | 8.910   | 20.971  | 13.386  | -0.942 |
| gga-miR-31-5p   | 1320.507  | 721.356   | 207.097  | 258.786  | ENSGALT00000103036 | ENSGALG00000051431 | RPS15A   | 165.907 | 197.618 | 336.124 | 314.476 | -0.847 |
| gga-miR-31-5p   | 1320.507  | 721.356   | 207.097  | 258.786  | ENSGALT00000010253 | ENSGALG00000006343 | ACTA2    | 19.882  | 58.427  | 157.816 | 79.771  | -0.999 |
| gga-miR-31-5p   | 1320.507  | 721.356   | 207.097  | 258.786  | ENSGALT00000052239 | ENSGALG00000039585 | -        | 0.096   | 0.172   | 37.665  | 0.197   | -0.543 |
| gga-miR-31-5p   | 1320.507  | 721.356   | 207.097  | 258.786  | ENSGALT00000050091 | ENSGALG00000043582 | -        | 3.010   | 5.985   | 41.582  | 51.534  | -0.884 |
| gga-miR-31-5p   | 1320.507  | 721.356   | 207.097  | 258.786  | ENSGALT00000050748 | ENSGALG00000041338 | -        | 0.000   | 0.253   | 1.848   | 0.218   | -0.629 |
| gga-miR-7       | 23595.605 | 14786.197 | 2323.843 | 5333.079 | ENSGALT00000023632 | ENSGALG00000014662 | RBP5     | 20.095  | 26.791  | 52.352  | 35.021  | -0.909 |
| gga-miR-301a-3p | 4.210     | 1.039     | 0.984    | 1.142    | ENSGALT00000102159 | ENSGALG00000009512 | TFPI2    | 166.715 | 149.873 | 393.079 | 239.139 | -0.441 |
| novel_147       | 1.353     | 0.569     | 0.087    | 0.000    | ENSGALT00000036256 | ENSGALG00000005678 | FLNB     | 3.900   | 4.577   | 8.811   | 5.022   | -0.624 |
| novel_147       | 1.353     | 0.569     | 0.087    | 0.000    | ENSGALT00000092705 | ENSGALG00000007721 | ARHGAP21 | 7.810   | 9.042   | 19.036  | 16.593  | -0.874 |
| novel_147       | 1.353     | 0.569     | 0.087    | 0.000    | ENSGALT00000056798 | ENSGALG00000042642 | RARRES2  | 46.292  | 68.236  | 105.350 | 74.137  | -0.817 |
| gga-miR-490-3p  | 2.493     | 1.165     | 0.554    | 1.177    | ENSGALT00000061435 | ENSGALG00000032736 | MGLL     | 5.969   | 8.026   | 20.631  | 12.696  | -0.824 |
| gga-miR-490-3p  | 2.493     | 1.165     | 0.554    | 1.177    | ENSGALT00000083326 | ENSGALG00000015908 | COL12A1  | 20.394  | 20.084  | 48.874  | 22.602  | -0.669 |
| gga-miR-490-3p  | 2.493     | 1.165     | 0.554    | 1.177    | ENSGALT00000107869 | ENSGALG00000044996 | TMEM71   | 0.000   | 0.000   | 0.576   | 0.523   | -0.700 |
| gga-miR-202-3p  | 29.032    | 17.149    | 6.251    | 9.523    | ENSGALT00000092961 | ENSGALG00000035923 | MTMR11   | 0.681   | 1.143   | 2.456   | 1.468   | -0.890 |
| gga-miR-204     | 173.788   | 85.174    | 21.500   | 43.574   | ENSGALT00000082443 | ENSGALG00000037262 | HOXC8    | 2.621   | 2.714   | 8.515   | 7.283   | -0.850 |
| gga-miR-204     | 173.788   | 85.174    | 21.500   | 43.574   | ENSGALT00000093973 | ENSGALG00000054718 | FLNA     | 5.301   | 8.420   | 13.442  | 5.810   | -0.653 |
| gga-miR-204     | 173.788   | 85.174    | 21.500   | 43.574   | ENSGALT00000041399 | ENSGALG00000024486 | -        | 9.139   | 16.489  | 30.695  | 14.348  | -0.778 |
| gga-miR-204     | 173.788   | 85.174    | 21.500   | 43.574   | ENSGALT00000045637 | ENSGALG00000028721 | LMOD1    | 0.708   | 1.510   | 3.432   | 1.816   | -0.868 |
| gga-miR-204     | 173.788   | 85.174    | 21.500   | 43.574   | ENSGALT00000055938 | ENSGALG00000043675 | ANTXR2   | 12.378  | 16.272  | 29.792  | 20.650  | -0.881 |
| gga-miR-204     | 173.788   | 85.174    | 21.500   | 43.574   | ENSGALT00000068230 | ENSGALG00000028512 | LCOR     | 0.000   | 0.713   | 0.396   | 0.314   | -0.547 |
| gga-miR-204     | 173.788   | 85.174    | 21.500   | 43.574   | ENSGALT00000096902 | ENSGALG00000055101 | TASOR2   | 0.000   | 0.354   | 0.408   | 0.427   | -0.959 |
| gga-miR-204     | 173.788   | 85.174    | 21.500   | 43.574   | ENSGALT00000054723 | ENSGALG00000035960 | -        | 0.000   | 0.127   | 0.121   | 0.532   | -0.568 |
| gga-miR-449a    | 141.695   | 74.031    | 20.734   | 20.688   | ENSGALT00000012307 | ENSGALG00000007611 | RPL35A   | 223.206 | 297.753 | 521.852 | 494.983 | -0.955 |
| gga-miR-449a    | 141.695   | 74.031    | 20.734   | 20.688   | ENSGALT00000089897 | ENSGALG00000045671 | -        | 3.370   | 5.605   | 10.734  | 5.779   | -0.755 |
| gga-miR-449a    | 141.695   | 74.031    | 20.734   | 20.688   | ENSGALT00000083335 | ENSGALG00000044866 | -        | 0.810   | 2.307   | 5.233   | 2.594   | -0.808 |
| gga-miR-449a    | 141.695   | 74.031    | 20.734   | 20.688   | ENSGALT00000100490 | ENSGALG00000053601 | LPXN     | 0.000   | 0.017   | 0.199   | 0.000   | -0.509 |

|                   |         |        |        |        |                    |                    |         |         |         |         |         |        |
|-------------------|---------|--------|--------|--------|--------------------|--------------------|---------|---------|---------|---------|---------|--------|
| gga-miR-449a      | 141.695 | 74.031 | 20.734 | 20.688 | ENSGALT00000103701 | ENSGALG00000040484 | SEC31A  | 0.000   | 0.000   | 1.304   | 0.231   | -0.623 |
| gga-miR-449a      | 141.695 | 74.031 | 20.734 | 20.688 | ENSGALT00000081517 | ENSGALG00000001331 | ST14    | 0.003   | 1.783   | 0.779   | 1.383   | -0.574 |
| gga-miR-449a      | 141.695 | 74.031 | 20.734 | 20.688 | ENSGALT00000088232 | ENSGALG00000045584 | -       | 56.702  | 71.595  | 121.604 | 82.792  | -0.799 |
| gga-miR-449a      | 141.695 | 74.031 | 20.734 | 20.688 | ENSGALT00000000203 | ENSGALG00000008022 | TAPBP   | 16.005  | 27.456  | 34.611  | 31.539  | -0.981 |
| gga-miR-449a      | 141.695 | 74.031 | 20.734 | 20.688 | ENSGALT00000057614 | ENSGALG00000037522 | SBNO2   | 0.775   | 1.544   | 3.418   | 1.553   | -0.731 |
| gga-miR-449a      | 141.695 | 74.031 | 20.734 | 20.688 | ENSGALT00000095286 | ENSGALG00000048409 | TXNIP   | 16.251  | 22.318  | 47.768  | 52.353  | -0.930 |
| gga-miR-449a      | 141.695 | 74.031 | 20.734 | 20.688 | ENSGALT00000100845 | ENSGALG00000047024 | ZNF469  | 0.414   | 0.686   | 1.566   | 0.886   | -0.804 |
| gga-miR-124a-3p   | 1.311   | 4.307  | 0.272  | 0.562  | ENSGALT00000098007 | ENSGALG00000030587 | -       | 1.667   | 2.097   | 7.373   | 3.286   | -0.568 |
| gga-miR-124a-3p   | 1.311   | 4.307  | 0.272  | 0.562  | ENSGALT00000095572 | ENSGALG00000002225 | RFFL    | 0.007   | 0.015   | 2.841   | 0.012   | -0.482 |
| gga-miR-124a-3p   | 1.311   | 4.307  | 0.272  | 0.562  | ENSGALT00000014048 | ENSGALG00000008621 | NRP2    | 0.860   | 0.000   | 2.224   | 2.854   | -0.870 |
| gga-miR-135a-2-3p | 1.719   | 1.246  | 0.271  | 0.581  | ENSGALT00000084136 | ENSGALG00000032868 | AHCYL2  | 7.199   | 0.000   | 0.912   | 0.781   | -0.702 |
| gga-miR-449a      | 141.695 | 74.031 | 20.734 | 20.688 | ENSGALT00000081028 | ENSGALG00000042555 | STAMPB  | 0.980   | 0.030   | 1.381   | 0.489   | -0.053 |
| gga-miR-449c-3p   | 3.178   | 1.483  | 0.362  | 0.472  | ENSGALT00000011840 | ENSGALG00000007319 | BICDL1  | 0.043   | 0.000   | 0.208   | 0.099   | -0.631 |
| gga-miR-449c-3p   | 3.178   | 1.483  | 0.362  | 0.472  | ENSGALT00000045144 | ENSGALG00000052868 | -       | 0.172   | 0.002   | 0.991   | 0.209   | -0.510 |
| gga-miR-449c-3p   | 3.178   | 1.483  | 0.362  | 0.472  | ENSGALT00000102786 | ENSGALG00000046708 | PTGES   | 1.278   | 0.030   | 1.741   | 2.226   | -0.396 |
| gga-miR-449c-3p   | 3.178   | 1.483  | 0.362  | 0.472  | ENSGALT00000099291 | ENSGALG00000042900 | GATAD2A | 1.350   | 0.000   | 1.570   | 1.798   | -0.245 |
| gga-miR-6634-5p   | 2.092   | 1.515  | 0.135  | 0.786  | ENSGALT00000105232 | ENSGALG00000011405 | SLC4A7  | 0.875   | 0.000   | 0.533   | 0.211   | -0.241 |
| gga-miR-6634-5p   | 2.092   | 1.515  | 0.135  | 0.786  | ENSGALT00000024734 | ENSGALG00000015324 | -       | 37.089  | 0.000   | 8.837   | 0.000   | -0.596 |
| gga-miR-449d-5p   | 107.422 | 57.048 | 18.984 | 20.620 | ENSGALT00000081028 | ENSGALG00000042555 | STAMPB  | 0.980   | 0.030   | 1.381   | 0.489   | -0.050 |
| gga-miR-449d-5p   | 107.422 | 57.048 | 18.984 | 20.620 | ENSGALT00000063343 | ENSGALG00000007767 | DIS3L2  | 0.306   | 0.000   | 0.409   | 0.000   | -0.159 |
| gga-miR-449b-5p   | 7.996   | 4.869  | 1.359  | 0.942  | ENSGALT00000071871 | ENSGALG00000012952 | BASP1   | 3.378   | 0.031   | 3.826   | 0.038   | -0.235 |
| gga-miR-449b-5p   | 7.996   | 4.869  | 1.359  | 0.942  | ENSGALT00000067478 | ENSGALG00000031216 | FLOT2   | 1.018   | 0.000   | 1.613   | 0.000   | -0.045 |
| gga-miR-449b-5p   | 7.996   | 4.869  | 1.359  | 0.942  | ENSGALT00000045144 | ENSGALG00000052868 | -       | 0.172   | 0.002   | 0.991   | 0.209   | -0.521 |
| gga-miR-449b-5p   | 7.996   | 4.869  | 1.359  | 0.942  | ENSGALT00000097384 | ENSGALG00000033171 | TGM4    | 1.124   | 0.040   | 3.208   | 0.416   | -0.301 |
| gga-miR-449b-5p   | 7.996   | 4.869  | 1.359  | 0.942  | ENSGALT00000101136 | ENSGALG00000040098 | EEF1D   | 138.575 | 100.184 | 276.236 | 152.421 | -0.549 |
| gga-miR-449b-5p   | 7.996   | 4.869  | 1.359  | 0.942  | ENSGALT00000081028 | ENSGALG00000042555 | STAMPB  | 0.980   | 0.030   | 1.381   | 0.489   | -0.103 |
| gga-miR-449b-5p   | 7.996   | 4.869  | 1.359  | 0.942  | ENSGALT00000101427 | ENSGALG00000002818 | VAT1    | 46.717  | 0.000   | 14.056  | 24.515  | -0.473 |

|                  |          |          |          |         |                    |                    |          |        |        |        |         |        |
|------------------|----------|----------|----------|---------|--------------------|--------------------|----------|--------|--------|--------|---------|--------|
| gga-miR-22-3p    | 3285.671 | 1923.811 | 1744.071 | 888.692 | ENSGALT00000073257 | ENSGALG00000031450 | MYO7A    | 0.000  | 0.012  | 0.000  | 0.545   | -0.726 |
| gga-miR-22-3p    | 3285.671 | 1923.811 | 1744.071 | 888.692 | ENSGALT00000013275 | ENSGALG00000008166 | TLR15    | 0.000  | 0.000  | 0.202  | 0.290   | -0.813 |
| gga-miR-22-3p    | 3285.671 | 1923.811 | 1744.071 | 888.692 | ENSGALT00000099432 | ENSGALG00000042254 | -        | 0.000  | 13.732 | 7.880  | 3.205   | -0.318 |
| gga-miR-2954     | 138.000  | 85.274   | 40.809   | 38.254  | ENSGALT00000079072 | ENSGALG00000034855 | HK2      | 0.005  | 0.000  | 0.293  | 4.691   | -0.572 |
| gga-miR-2954     | 138.000  | 85.274   | 40.809   | 38.254  | ENSGALT00000101669 | ENSGALG00000046896 | COLGALT1 | 0.000  | 0.000  | 0.000  | 1.894   | -0.531 |
| gga-miR-31-3p    | 68.163   | 30.520   | 7.562    | 17.545  | ENSGALT00000010179 | ENSGALG00000006298 | ATG4B    | 0.000  | 0.000  | 0.245  | 0.421   | -0.696 |
| gga-miR-205b     | 0.946    | 0.178    | 0.186    | 0.000   | ENSGALT00000079581 | ENSGALG00000040741 | DNM2     | 0.000  | 0.000  | 1.990  | 1.934   | -0.639 |
| gga-miR-449c-3p  | 3.178    | 1.483    | 0.362    | 0.472   | ENSGALT00000096003 | ENSGALG00000005188 | MINDY4   | 0.018  | 0.448  | 0.315  | 0.773   | -0.763 |
| gga-miR-449c-3p  | 3.178    | 1.483    | 0.362    | 0.472   | ENSGALT00000093025 | ENSGALG00000032776 | WDR7     | 0.000  | 0.000  | 0.000  | 0.973   | -0.461 |
| gga-miR-449c-3p  | 3.178    | 1.483    | 0.362    | 0.472   | ENSGALT00000061959 | ENSGALG00000008095 | KIF23    | 0.000  | 0.386  | 0.492  | 0.804   | -0.909 |
| gga-miR-449c-3p  | 3.178    | 1.483    | 0.362    | 0.472   | ENSGALT00000092609 | ENSGALG00000013039 | BID      | 0.000  | 0.566  | 0.002  | 2.866   | -0.473 |
| gga-miR-449c-3p  | 3.178    | 1.483    | 0.362    | 0.472   | ENSGALT00000098176 | ENSGALG00000028830 | -        | 0.000  | 0.171  | 0.126  | 0.236   | -0.825 |
| gga-miR-449c-3p  | 3.178    | 1.483    | 0.362    | 0.472   | ENSGALT00000095537 | ENSGALG00000028561 | SZT2     | 0.000  | 0.646  | 0.000  | 0.497   | -0.288 |
| gga-miR-449c-3p  | 3.178    | 1.483    | 0.362    | 0.472   | ENSGALT00000044036 | ENSGALG00000026591 | GNG12    | 0.024  | 4.138  | 0.054  | 4.992   | -0.394 |
| gga-miR-449c-3p  | 3.178    | 1.483    | 0.362    | 0.472   | ENSGALT00000103998 | ENSGALG00000034475 | EIF3G    | 0.000  | 7.082  | 0.000  | 11.292  | -0.431 |
| gga-miR-129-1-3p | 21.275   | 11.165   | 6.017    | 3.806   | ENSGALT00000018134 | ENSGALG00000011124 | ARHGAP24 | 0.000  | 0.425  | 0.734  | 0.790   | -0.997 |
| gga-miR-129-1-3p | 21.275   | 11.165   | 6.017    | 3.806   | ENSGALT00000005664 | ENSGALG00000003578 | FN1      | 10.375 | 30.378 | 67.299 | 26.656  | -0.637 |
| gga-miR-129-1-3p | 21.275   | 11.165   | 6.017    | 3.806   | ENSGALT00000069344 | ENSGALG00000028147 | CTSK     | 18.029 | 33.469 | 97.324 | 101.585 | -0.912 |
| gga-miR-129-1-3p | 21.275   | 11.165   | 6.017    | 3.806   | ENSGALT00000084926 | ENSGALG00000038536 | SH3BGRL3 | 18.307 | 50.409 | 20.995 | 77.351  | -0.604 |
| gga-miR-205a     | 5.803    | 3.520    | 2.372    | 1.368   | ENSGALT00000107116 | ENSGALG00000003601 | ATP2B4   | 0.000  | 0.662  | 1.826  | 1.436   | -0.900 |
| gga-miR-205a     | 5.803    | 3.520    | 2.372    | 1.368   | ENSGALT00000046917 | ENSGALG00000014881 | FAM184A  | 0.063  | 1.396  | 2.566  | 2.484   | -0.969 |
| gga-miR-135a-5p  | 105.055  | 43.817   | 13.092   | 13.579  | ENSGALT00000104026 | ENSGALG00000011642 | ANKRD17  | 0.000  | 0.000  | 0.014  | 0.549   | -0.483 |
| gga-miR-449d-5p  | 107.422  | 57.048   | 18.984   | 20.620  | ENSGALT00000095537 | ENSGALG00000028561 | SZT2     | 0.000  | 0.646  | 0.000  | 0.497   | -0.268 |
| gga-miR-449d-5p  | 107.422  | 57.048   | 18.984   | 20.620  | ENSGALT00000096003 | ENSGALG00000005188 | MINDY4   | 0.018  | 0.448  | 0.315  | 0.773   | -0.766 |
| gga-miR-449d-5p  | 107.422  | 57.048   | 18.984   | 20.620  | ENSGALT00000068778 | ENSGALG00000001561 | MXRA8    | 0.000  | 0.000  | 0.000  | 11.345  | -0.488 |
| gga-miR-449d-5p  | 107.422  | 57.048   | 18.984   | 20.620  | ENSGALT00000106020 | ENSGALG00000001319 | CAMK1G   | 0.000  | 0.000  | 0.124  | 0.197   | -0.822 |
| gga-miR-6660-3p  | 14.087   | 8.707    | 3.411    | 4.120   | ENSGALT00000063648 | ENSGALG00000033638 | SLC26A7  | 0.010  | 0.018  | 0.258  | 0.567   | -0.761 |
| gga-miR-6660-3p  | 14.087   | 8.707    | 3.411    | 4.120   | ENSGALT00000051175 | ENSGALG00000015101 | BNC2     | 0.000  | 0.000  | 0.000  | 0.504   | -0.468 |



|                 |         |         |         |        |                    |                    |          |        |        |        |        |        |
|-----------------|---------|---------|---------|--------|--------------------|--------------------|----------|--------|--------|--------|--------|--------|
| gga-miR-6660-3p | 14.087  | 8.707   | 3.411   | 4.120  | ENSGALT00000098176 | ENSGALG00000028830 | -        | 0.000  | 0.171  | 0.126  | 0.236  | -0.780 |
| gga-miR-6660-3p | 14.087  | 8.707   | 3.411   | 4.120  | ENSGALT00000025431 | ENSGALG00000015768 | ANKRD6   | 0.334  | 1.129  | 1.107  | 2.084  | -0.791 |
| gga-miR-6660-3p | 14.087  | 8.707   | 3.411   | 4.120  | ENSGALT00000095537 | ENSGALG00000028561 | SZT2     | 0.000  | 0.646  | 0.000  | 0.497  | -0.200 |
| gga-miR-6660-3p | 14.087  | 8.707   | 3.411   | 4.120  | ENSGALT00000100656 | ENSGALG00000008385 | PIIP5K1  | 0.000  | 0.753  | 0.044  | 0.924  | -0.359 |
| gga-miR-34b-5p  | 500.250 | 318.885 | 106.799 | 45.009 | ENSGALT00000095537 | ENSGALG00000028561 | SZT2     | 0.000  | 0.646  | 0.000  | 0.497  | -0.235 |
| gga-miR-34b-5p  | 500.250 | 318.885 | 106.799 | 45.009 | ENSGALT00000056664 | ENSGALG00000035679 | LMO1     | 0.005  | 2.518  | 0.634  | 2.896  | -0.529 |
| gga-miR-449b-5p | 7.996   | 4.869   | 1.359   | 0.942  | ENSGALT00000104556 | ENSGALG00000000225 | MGAT4C   | 0.007  | 0.063  | 0.352  | 0.298  | -0.950 |
| gga-miR-449b-5p | 7.996   | 4.869   | 1.359   | 0.942  | ENSGALT00000097466 | ENSGALG00000000336 | PPP1R12B | 2.294  | 9.372  | 7.333  | 10.934 | -0.783 |
| gga-miR-449b-5p | 7.996   | 4.869   | 1.359   | 0.942  | ENSGALT00000077925 | ENSGALG00000029408 | BAZ1B    | 0.000  | 0.000  | 0.000  | 2.036  | -0.574 |
| gga-miR-449b-5p | 7.996   | 4.869   | 1.359   | 0.942  | ENSGALT00000098176 | ENSGALG00000028830 | -        | 0.000  | 0.171  | 0.126  | 0.236  | -0.803 |
| gga-miR-449b-5p | 7.996   | 4.869   | 1.359   | 0.942  | ENSGALT00000095537 | ENSGALG00000028561 | SZT2     | 0.000  | 0.646  | 0.000  | 0.497  | -0.216 |
| gga-miR-449b-5p | 7.996   | 4.869   | 1.359   | 0.942  | ENSGALT00000068374 | ENSGALG00000041213 | ARHGAP17 | 0.000  | 0.186  | 0.000  | 0.649  | -0.542 |
| gga-miR-449b-5p | 7.996   | 4.869   | 1.359   | 0.942  | ENSGALT00000103998 | ENSGALG00000034475 | EIF3G    | 0.000  | 7.082  | 0.000  | 11.292 | -0.443 |
| gga-miR-449b-5p | 7.996   | 4.869   | 1.359   | 0.942  | ENSGALT00000084092 | ENSGALG00000008114 | SFXN2    | 0.146  | 0.217  | 0.949  | 2.239  | -0.813 |
| gga-miR-449b-5p | 7.996   | 4.869   | 1.359   | 0.942  | ENSGALT00000106020 | ENSGALG00000001319 | CAMK1G   | 0.000  | 0.000  | 0.124  | 0.197  | -0.893 |
| gga-miR-449b-5p | 7.996   | 4.869   | 1.359   | 0.942  | ENSGALT00000022483 | ENSGALG00000013861 | TNFAIP3  | 0.000  | 0.000  | 0.490  | 0.651  | -0.913 |
| gga-miR-449c-5p | 10.423  | 3.526   | 1.891   | 1.095  | ENSGALT00000077925 | ENSGALG00000029408 | BAZ1B    | 0.000  | 0.000  | 0.000  | 2.036  | -0.493 |
| gga-miR-449c-5p | 10.423  | 3.526   | 1.891   | 1.095  | ENSGALT00000095704 | ENSGALG00000006385 | UBXN7    | 0.302  | 0.438  | 0.430  | 2.881  | -0.534 |
| gga-miR-449c-5p | 10.423  | 3.526   | 1.891   | 1.095  | ENSGALT00000097466 | ENSGALG00000000336 | PPP1R12B | 2.294  | 9.372  | 7.333  | 10.934 | -0.917 |
| gga-miR-449c-5p | 10.423  | 3.526   | 1.891   | 1.095  | ENSGALT00000050088 | ENSGALG00000040098 | EEF1D    | 0.254  | 0.289  | 0.265  | 10.446 | -0.494 |
| gga-miR-449c-5p | 10.423  | 3.526   | 1.891   | 1.095  | ENSGALT00000022483 | ENSGALG00000013861 | TNFAIP3  | 0.000  | 0.000  | 0.490  | 0.651  | -0.745 |
| gga-miR-449c-5p | 10.423  | 3.526   | 1.891   | 1.095  | ENSGALT00000106020 | ENSGALG00000001319 | CAMK1G   | 0.000  | 0.000  | 0.124  | 0.197  | -0.733 |
| gga-miR-449c-5p | 10.423  | 3.526   | 1.891   | 1.095  | ENSGALT00000084092 | ENSGALG00000008114 | SFXN2    | 0.146  | 0.217  | 0.949  | 2.239  | -0.687 |
| gga-miR-449c-5p | 10.423  | 3.526   | 1.891   | 1.095  | ENSGALT00000068374 | ENSGALG00000041213 | ARHGAP17 | 0.000  | 0.186  | 0.000  | 0.649  | -0.555 |
| gga-miR-449c-5p | 10.423  | 3.526   | 1.891   | 1.095  | ENSGALT00000085567 | ENSGALG00000045540 | -        | 13.476 | 19.590 | 26.424 | 37.803 | -0.835 |
| gga-miR-449c-5p | 10.423  | 3.526   | 1.891   | 1.095  | ENSGALT00000095537 | ENSGALG00000028561 | SZT2     | 0.000  | 0.646  | 0.000  | 0.497  | -0.472 |
| gga-miR-449c-5p | 10.423  | 3.526   | 1.891   | 1.095  | ENSGALT00000098176 | ENSGALG00000028830 | -        | 0.000  | 0.171  | 0.126  | 0.236  | -0.911 |
| gga-miR-204     | 173.788 | 85.174  | 21.500  | 43.574 | ENSGALT00000097466 | ENSGALG00000000336 | PPP1R12B | 2.294  | 9.372  | 7.333  | 10.934 | -0.783 |

|                 |          |         |         |         |                    |                    |           |        |        |        |        |        |
|-----------------|----------|---------|---------|---------|--------------------|--------------------|-----------|--------|--------|--------|--------|--------|
| gga-miR-34c-5p  | 232.276  | 150.278 | 42.141  | 18.492  | ENSGALT00000099703 | ENSGALG00000015573 | FHL5      | 2.929  | 4.503  | 8.192  | 9.779  | -0.985 |
| gga-miR-34c-5p  | 232.276  | 150.278 | 42.141  | 18.492  | ENSGALT00000094753 | ENSGALG00000015377 | PHLDB2    | 0.014  | 0.007  | 0.858  | 1.557  | -0.901 |
| gga-miR-34c-5p  | 232.276  | 150.278 | 42.141  | 18.492  | ENSGALT00000084092 | ENSGALG00000008114 | SFXN2     | 0.146  | 0.217  | 0.949  | 2.239  | -0.849 |
| gga-miR-34c-5p  | 232.276  | 150.278 | 42.141  | 18.492  | ENSGALT00000095537 | ENSGALG00000028561 | SZT2      | 0.000  | 0.646  | 0.000  | 0.497  | -0.204 |
| gga-miR-34c-5p  | 232.276  | 150.278 | 42.141  | 18.492  | ENSGALT00000054220 | ENSGALG00000033694 | IFI30     | 12.925 | 32.645 | 67.802 | 49.969 | -0.916 |
| gga-miR-34c-5p  | 232.276  | 150.278 | 42.141  | 18.492  | ENSGALT00000081517 | ENSGALG00000001331 | ST14      | 0.003  | 1.783  | 0.779  | 1.383  | -0.478 |
| gga-miR-31-5p   | 1320.507 | 721.356 | 207.097 | 258.786 | ENSGALT00000022483 | ENSGALG00000013861 | TNFAIP3   | 0.000  | 0.000  | 0.490  | 0.651  | -0.855 |
| gga-miR-31-5p   | 1320.507 | 721.356 | 207.097 | 258.786 | ENSGALT00000072687 | ENSGALG00000013649 | CNOT7     | 4.029  | 28.072 | 3.814  | 31.770 | -0.336 |
| gga-miR-31-5p   | 1320.507 | 721.356 | 207.097 | 258.786 | ENSGALT00000085724 | ENSGALG00000007753 | POLL      | 0.466  | 1.791  | 1.837  | 2.731  | -0.887 |
| gga-miR-449a    | 141.695  | 74.031  | 20.734  | 20.688  | ENSGALT00000085567 | ENSGALG00000045540 | -         | 13.476 | 19.590 | 26.424 | 37.803 | -0.872 |
| gga-miR-449a    | 141.695  | 74.031  | 20.734  | 20.688  | ENSGALT00000101521 | ENSGALG00000037787 | MEF2D     | 0.411  | 0.000  | 0.012  | 0.369  | -0.397 |
| gga-miR-449a    | 141.695  | 74.031  | 20.734  | 20.688  | ENSGALT00000030611 | ENSGALG00000019322 | TNFRSF13C | 0.044  | 0.000  | 0.193  | 0.440  | -0.707 |
| gga-miR-34c-5p  | 232.276  | 150.278 | 42.141  | 18.492  | ENSGALT00000030611 | ENSGALG00000019322 | TNFRSF13C | 0.044  | 0.000  | 0.193  | 0.440  | -0.821 |
| gga-miR-130b-5p | 6.137    | 5.208   | 1.683   | 1.839   | ENSGALT00000092143 | ENSGALG00000016427 | ADAM17    | 0.315  | 0.000  | 0.273  | 0.346  | -0.406 |
| gga-miR-449b-5p | 7.996    | 4.869   | 1.359   | 0.942   | ENSGALT00000030611 | ENSGALG00000019322 | TNFRSF13C | 0.044  | 0.000  | 0.193  | 0.440  | -0.780 |
| gga-miR-449b-5p | 7.996    | 4.869   | 1.359   | 0.942   | ENSGALT00000097681 | ENSGALG00000006791 | TTI1      | 0.064  | 0.000  | 0.036  | 0.216  | -0.460 |
| gga-miR-449b-5p | 7.996    | 4.869   | 1.359   | 0.942   | ENSGALT00000097087 | ENSGALG00000040364 | HERPUD2   | 1.370  | 0.055  | 0.061  | 1.684  | -0.102 |
| gga-miR-449b-5p | 7.996    | 4.869   | 1.359   | 0.942   | ENSGALT00000101521 | ENSGALG00000037787 | MEF2D     | 0.411  | 0.000  | 0.012  | 0.369  | -0.293 |
| gga-miR-449b-5p | 7.996    | 4.869   | 1.359   | 0.942   | ENSGALT00000048408 | ENSGALG00000006895 | CEP131    | 1.062  | 0.001  | 0.000  | 1.493  | -0.028 |
| gga-miR-133c-3p | 16.707   | 15.505  | 33.699  | 9.452   | ENSGALT00000107995 | ENSGALG00000010538 | TTC27     | 0.000  | 1.029  | 0.000  | 5.118  | -0.677 |
| gga-miR-133c-3p | 16.707   | 15.505  | 33.699  | 9.452   | ENSGALT00000048408 | ENSGALG00000006895 | CEP131    | 1.062  | 0.001  | 0.000  | 1.493  | -0.689 |
| gga-miR-143-5p  | 326.004  | 491.847 | 823.909 | 272.415 | ENSGALT00000048408 | ENSGALG00000006895 | CEP131    | 1.062  | 0.001  | 0.000  | 1.493  | -0.831 |
| gga-miR-143-5p  | 326.004  | 491.847 | 823.909 | 272.415 | ENSGALT00000065165 | ENSGALG00000029268 | CIAPIN1   | 13.763 | 17.016 | 4.715  | 19.491 | -0.885 |
| gga-miR-143-5p  | 326.004  | 491.847 | 823.909 | 272.415 | ENSGALT00000100689 | ENSGALG00000010733 | CEP170    | 0.275  | 0.000  | 0.000  | 2.014  | -0.632 |
| gga-miR-143-5p  | 326.004  | 491.847 | 823.909 | 272.415 | ENSGALT00000075255 | ENSGALG00000023898 | -         | 1.473  | 0.082  | 0.103  | 1.661  | -0.832 |
| gga-miR-143-5p  | 326.004  | 491.847 | 823.909 | 272.415 | ENSGALT00000027488 | ENSGALG00000017018 | INTS6     | 2.543  | 0.274  | 0.000  | 1.508  | -0.794 |
| gga-miR-143-5p  | 326.004  | 491.847 | 823.909 | 272.415 | ENSGALT00000095588 | ENSGALG00000006704 | VPS8      | 1.563  | 1.554  | 0.000  | 1.014  | -0.779 |
| gga-miR-143-5p  | 326.004  | 491.847 | 823.909 | 272.415 | ENSGALT00000074641 | ENSGALG00000006851 | -         | 2.618  | 1.886  | 0.019  | 1.297  | -0.775 |

|                 |         |         |         |         |                    |                    |        |       |       |       |       |        |
|-----------------|---------|---------|---------|---------|--------------------|--------------------|--------|-------|-------|-------|-------|--------|
| gga-miR-143-5p  | 326.004 | 491.847 | 823.909 | 272.415 | ENSGALT00000075579 | ENSGALG00000010313 | MAST2  | 0.000 | 0.000 | 0.000 | 2.482 | -0.553 |
| gga-miR-143-5p  | 326.004 | 491.847 | 823.909 | 272.415 | ENSGALT00000095537 | ENSGALG00000028561 | SZT2   | 0.000 | 0.646 | 0.000 | 0.497 | -0.375 |
| gga-miR-143-5p  | 326.004 | 491.847 | 823.909 | 272.415 | ENSGALT00000098331 | ENSGALG00000041423 | MAP7D3 | 0.990 | 0.799 | 0.000 | 1.642 | -0.950 |
| gga-miR-133a-3p | 107.574 | 99.409  | 202.785 | 80.977  | ENSGALT00000048408 | ENSGALG00000006895 | CEP131 | 1.062 | 0.001 | 0.000 | 1.493 | -0.632 |
| gga-miR-133a-3p | 107.574 | 99.409  | 202.785 | 80.977  | ENSGALT00000107995 | ENSGALG00000010538 | TTC27  | 0.000 | 1.029 | 0.000 | 5.118 | -0.596 |
| gga-miR-133b    | 4.414   | 2.254   | 7.236   | 1.939   | ENSGALT00000048408 | ENSGALG00000006895 | CEP131 | 1.062 | 0.001 | 0.000 | 1.493 | -0.457 |
| gga-miR-210b-5p | 11.042  | 11.594  | 22.074  | 7.613   | ENSGALT00000087758 | ENSGALG00000000652 | ACOT7  | 0.639 | 1.106 | 0.000 | 2.724 | -0.818 |
| gga-miR-210b-5p | 11.042  | 11.594  | 22.074  | 7.613   | ENSGALT00000070461 | ENSGALG00000004171 | RNF111 | 0.509 | 0.298 | 0.000 | 0.301 | -0.796 |

Note: The expression levels of miRNA and mRNA were presented by TPM and FPKM, respectively.

**Table 2.** The list of top 30 significantly enriched GO terms of all the target genes of DE miRNAs in ovary during the four development stages of hens ( $p < 0.01$ ).

| GO_Accession | Description                                                      | Term_Type          | _pValue   | DEG Number | DEG Name                                                                                                                                                     |
|--------------|------------------------------------------------------------------|--------------------|-----------|------------|--------------------------------------------------------------------------------------------------------------------------------------------------------------|
| GO:0009607   | response to biotic stimulus                                      | biological process | 0.0010151 | 19         | TNFAIP3, RPS15A, B2M, GNLY, ACTA2, ANKRD17, ENO1, ADAM17, STMN1, RARRES2, CNOT7, TLR15, TGFB1, IL15, SBNO2, TXNIP, GNG12, RBPJ, AVD                          |
| GO:0022409   | positive regulation of cell-cell adhesion                        | biological process | 0.0010221 | 8          | IL15, TGFB1, FLOT2, KIF26B, THY1, Ii, PTPRU, IHH                                                                                                             |
| GO:0002478   | antigen processing and presentation of exogenous peptide antigen | biological process | 0.0010465 | 2          | B2M, Ii                                                                                                                                                      |
| GO:0016050   | vesicle organization                                             | biological process | 0.0010929 | 11         | ANKRD27, RAB7A, MYO7A, ZEB2, VPS8, DNM2, STX17, CLTCL1, VPS11, SEC31A, MYO18A                                                                                |
| GO:0045799   | positive regulation of chromatin assembly or disassembly         | biological process | 0.0014442 | 2          | TAL1, TPR                                                                                                                                                    |
| GO:0085029   | extracellular matrix assembly                                    | biological process | 0.001581  | 4          | RAMP2, IHH, PHL DB2, TGFB1                                                                                                                                   |
| GO:0051707   | response to other organism                                       | biological process | 0.001705  | 18         | GNG12, IL15, SBNO2, AVD, TGFB1, RBPJ, ENO1, ACTA2, ANKRD17, GNLY, B2M, TNFAIP3, RPS15A, TLR15, RARRES2, CNOT7, STMN1, ADAM17                                 |
| GO:0043207   | response to external biotic stimulus                             | biological process | 0.0017737 | 18         | RPS15A, TNFAIP3, GNLY, B2M, ANKRD17, ACTA2, ENO1, ADAM17, STMN1, TLR15, CNOT7, RARRES2, TGFB1, SBNO2, IL15, GNG12, RBPJ, AVD                                 |
| GO:0030029   | actin filament-based process                                     | biological process | 0.0023839 | 22         | TPM1, BRT-1, STMN1, TPM3, EPHA5, LMOD1, ARHGAP17, CNN1, KIF23, ARPC1B, FLNB, MYO18A, PHLDB2, MYO7A, DPYSL3, PDLIM7, KANK3, TGFB1, NTRK3, EHD2, CACNA1G, SMTN |
| GO:0030036   | actin cytoskeleton organization                                  | biological process | 0.002487  | 20         | TGFB1, KANK3, FLNB, PDLIM7, EHD2, NTRK3, SMTN, ARPC1B, PHLDB2, MYO18A, DPYSL3, CNN1, ARHGAP17, KIF23, TPM1, STMN1, BRT-1, EPHA5, LMOD1, TPM3                 |

|            |                                                   |                    |            |    |                                                                                                                                                                                                                                                                                                 |
|------------|---------------------------------------------------|--------------------|------------|----|-------------------------------------------------------------------------------------------------------------------------------------------------------------------------------------------------------------------------------------------------------------------------------------------------|
| GO:0045621 | positive regulation of lymphocyte differentiation | biological process | 0.0031567  | 5  | Ii, IHH, INPP5D, IL15, TGFB1                                                                                                                                                                                                                                                                    |
| GO:1900122 | positive regulation of receptor binding           | biological process | 0.0033402  | 2  | B2M, MMP9                                                                                                                                                                                                                                                                                       |
| GO:0032740 | positive regulation of interleukin-17 production  | biological process | 0.0033766  | 2  | IL15, TGFB1                                                                                                                                                                                                                                                                                     |
| GO:0045785 | positive regulation of cell adhesion              | biological process | 0.00355    | 11 | FLOT2, KIF26B, FN1, IL15, TGFB1, PTPRU, Ii, IHH, TGM2, THY1, NINJ1                                                                                                                                                                                                                              |
| GO:0038127 | ERBB signaling pathway                            | biological process | 0.0039636  | 6  | RAB7A, KIF16B, MMP9, RBPJ, TGFB1, ADAM17                                                                                                                                                                                                                                                        |
| GO:0006692 | prostanoid metabolic process                      | biological process | 0.004016   | 3  | PTGES, Ii, HPGDS                                                                                                                                                                                                                                                                                |
| GO:0015629 | actin cytoskeleton                                | cellular component | 7.32E-06   | 22 | ADAM17, TPM1, HSPB7, LPXN, BRT-1, LMOD1, TPM3, INTS6, CSRP1, VPS11, FLNB, ACTA2, ARPC1B, MYO7A, ENSGALG00000035960, PXN, MYO18A, PDLIM7, FLOT2, SMTN, ARHGAP21, GNG12                                                                                                                           |
| GO:0042611 | MHC protein complex                               | cellular component | 0.00036081 | 3  | DMB2, B2M, Ii                                                                                                                                                                                                                                                                                   |
| GO:0042641 | actomyosin                                        | cellular component | 0.00090579 | 6  | PXN, MYO18A, FLNB, CSRP1, TPM1, PDLIM7                                                                                                                                                                                                                                                          |
| GO:0005912 | adherens junction                                 | cellular component | 0.0010839  | 13 | CSRP1, DST, FLNB, PDLIM7, DES, FLOT2, ADAM17, FAM129B, ARVCF, LPXN, PXN, PHLDB2, EPHA5                                                                                                                                                                                                          |
| GO:0005884 | actin filament                                    | cellular component | 0.0012877  | 7  | VPS11, BRT-1, PDLIM7, TPM1, SMTN, TPM3, GNG12                                                                                                                                                                                                                                                   |
| GO:0070161 | anchoring junction                                | cellular component | 0.0013467  | 13 | EPHA5, PHLDB2, LPXN, PXN, FAM129B, ARVCF, ADAM17, FLOT2, DES, DST, FLNB, CSRP1, PDLIM7, EHD2, IL15, TGFB1, ST14, HBBA, CEP131, AVD, CST3, IHH, APOLD1, CPXM1, FN1, KIF23, COL6A3, NRTN, B2M, IGFBP4, OLFML3, CTSK, SEMA6B, ADA2, DIPK2A, ENSGALG00000003283, RNPEP, LOXL1, HTRA1, BF2, COL12A1, |
| GO:0005576 | extracellular region                              | cellular component | 0.0017811  | 33 |                                                                                                                                                                                                                                                                                                 |

|            |                                           |                    |           |   |                                                   |
|------------|-------------------------------------------|--------------------|-----------|---|---------------------------------------------------|
|            |                                           |                    |           |   | ADAMTS4, ENSGALG00000024486, RARRES2, MMP9, TFPI2 |
| GO:0001725 | stress fiber                              | cellular component | 0.0020894 | 5 | PXN, CSRP1, FLNB, PDLIM7, TPM1                    |
| GO:0032432 | actin filament bundle                     | cellular component | 0.0032743 | 5 | PXN, TPM1, FLNB, CSRP1, PDLIM7                    |
| GO:0005833 | hemoglobin complex                        | cellular component | 0.0038487 | 2 | HBE1, HBBA                                        |
| GO:0019842 | vitamin binding                           | molecular function | 0.0011092 | 5 | RBP5, AVD, P4HA3, OGDH, ENSGALG00000031546,       |
| GO:0004364 | glutathione transferase activity          | molecular function | 0.0028833 | 3 | ENSGALG00000005204, HPGDS, PTGES                  |
| GO:0030550 | acetylcholine receptor inhibitor activity | molecular function | 0.0031805 | 2 | ENSGALG00000039585, ENSGALG00000043582            |
| GO:0005030 | neurotrophin receptor activity            | molecular function | 0.0031919 | 2 | NTRK3, NTRK2                                      |

**Table 3.** The list of the significant KEGG classification of target genes of DE miRNAs in ovary during the four development stages of hens ( $p < 0.05$ ).

| Terms    | Pathways                                     | <i>p</i> Value | DEGs Number | Gene Name                                                                              |
|----------|----------------------------------------------|----------------|-------------|----------------------------------------------------------------------------------------|
| gga04144 | Endocytosis                                  | 0.008722       | 11          | EHD2, AGAP3, RAB7A, ARAP3, STAMBP, TGFB1, BF2, DNM2, CLTCL1, ACAP1, ENSGALG00000047393 |
| gga04672 | Intestinal immune network for IgA production | 0.00988        | 4           | IL15, TNFRSF13C, DMB2, PIGR                                                            |
| gga01230 | Biosynthesis of amino acids                  | 0.017353       | 5           | PRPS2, AADAT, ENO1, GLUL, ASS1                                                         |
| gga00310 | Lysine degradation                           | 0.02805        | 4           | AADAT, OGDH, COLGALT1, ENSGALG00000006818                                              |
| gga04261 | Adrenergic signaling in cardiomyocytes       | 0.031907       | 7           | CAMK2B, TPM1, BRT-1, TPM3, AKT2, ATP2B4, ENSGALG00000035960                            |
| gga04010 | MAPK signaling pathway                       | 0.039785       | 10          | MAPKKK3L, NTRK2, STMN1, TGFB1, GNG12, FLNA, CACNA1G, FLNB, AKT2, NFATC1                |
| gga00051 | Fructose and mannose metabolism              | 0.048926       | 3           | GMDS, PFKFB3, HK2                                                                      |
